# Supplementary material for: NADP(H) allosterically regulates the interaction between ferredoxin and ferredoxin‐NADP+ reductase
Source: PubMed Central journal article supplement (PMC6886308; doi:10.1002/2211-5463.12752), 2019-11-15
Supplement: FEB4-9-2126-s002.pdf [file FEB4-9-2126-s002.pdf]

Cyt c reduction assay of wild-type FNR at 50  $\mu$ M NADPH  
 numbers below X-axis: concentration of LFd ( $\mu$ M)

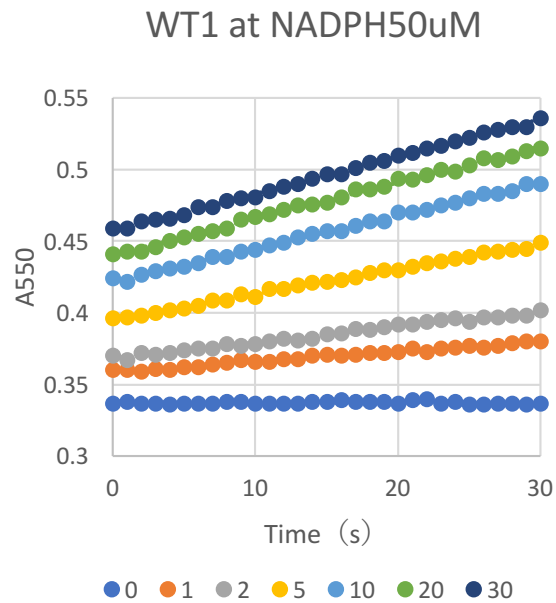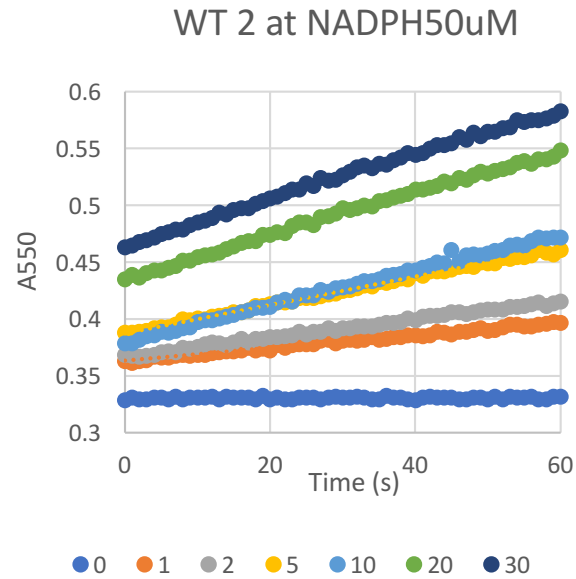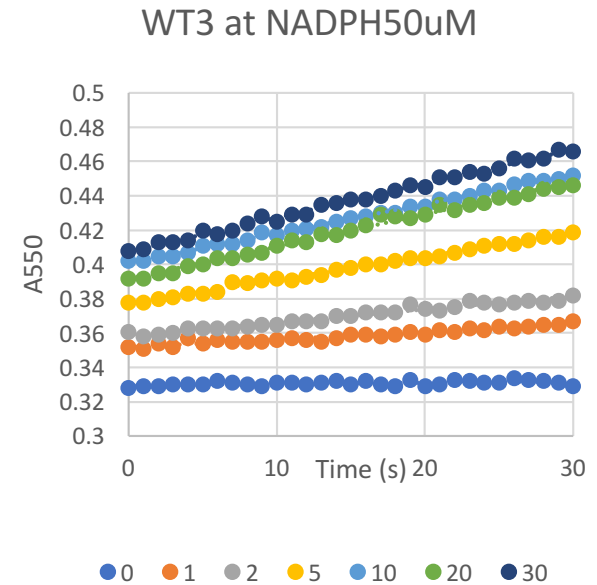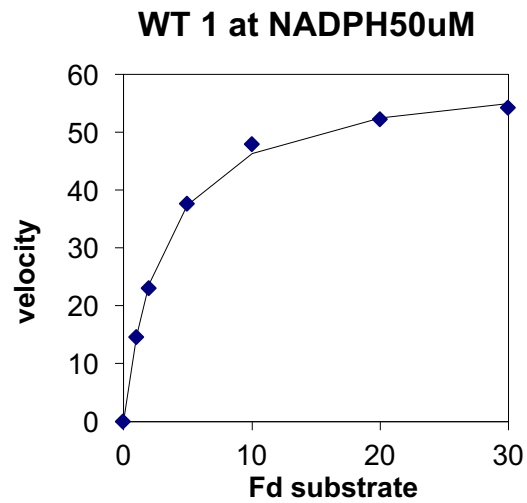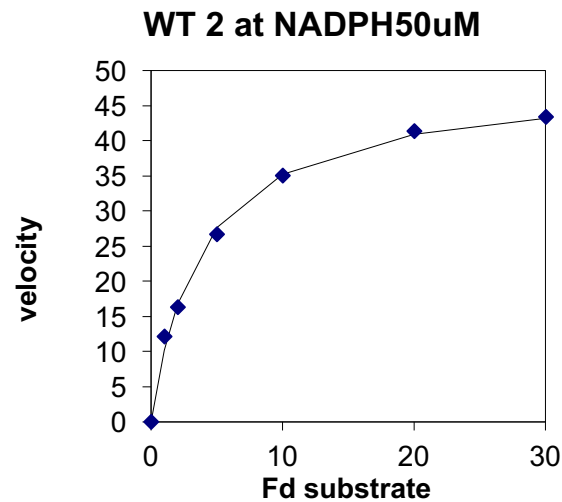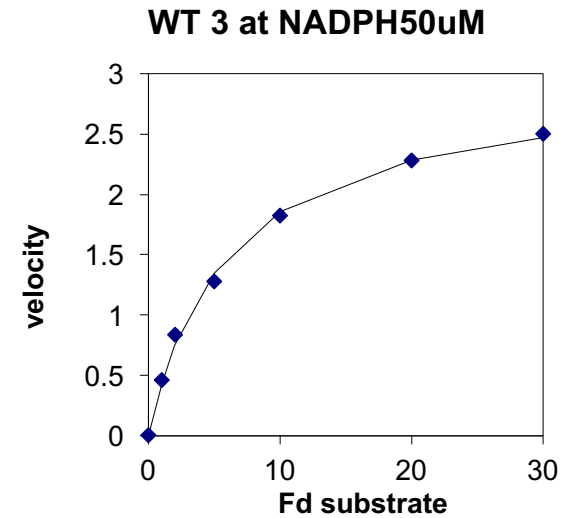

|                | 1           | 2           | 3           | Average     | SD          |
|----------------|-------------|-------------|-------------|-------------|-------------|
| Km ( $\mu$ M)= | 3.106619487 | 3.808317081 | 3.699670092 | 3.53820222  | 0.308381564 |
| Vmax (e/s)=    | 60.64829602 | 48.68677721 | 45.44797788 | 51.59435037 | 6.537221846 |

# Y314S at 50 $\mu\text{M}$ NADPH

## Y314S 1 at NADPH50uM

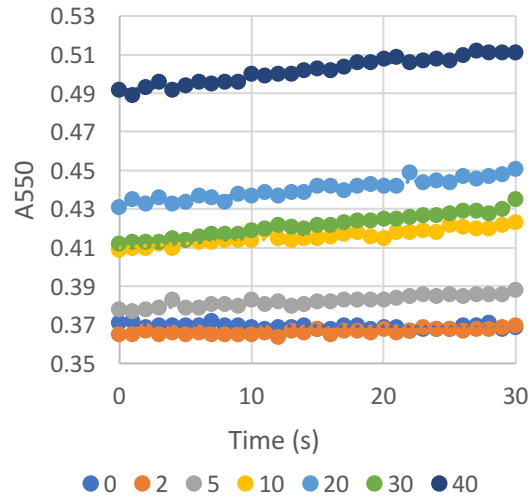

## Y314S 2 at NADPH50uM

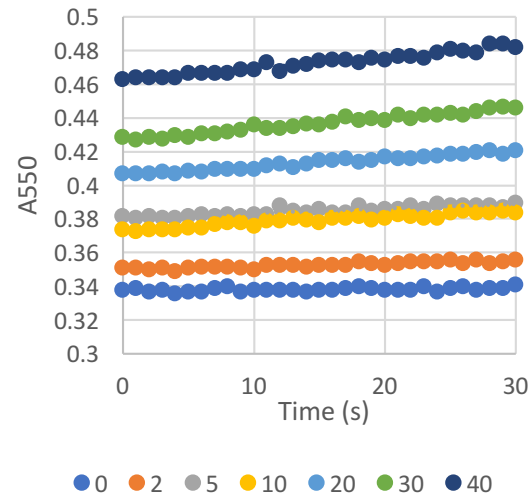

## Y314S 3 at NADPH50uM

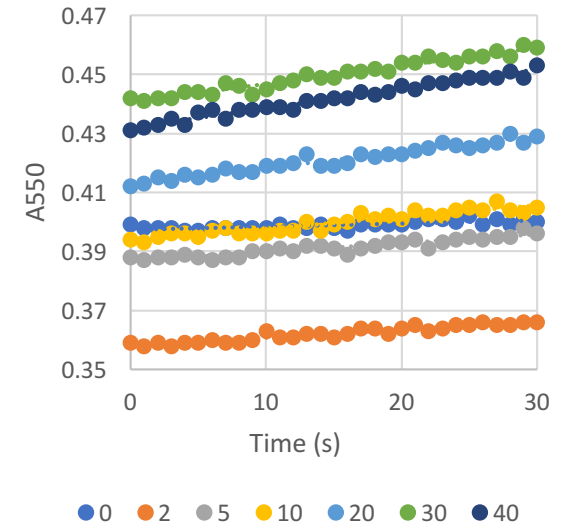

## Y314S 1 at NADPH50uM

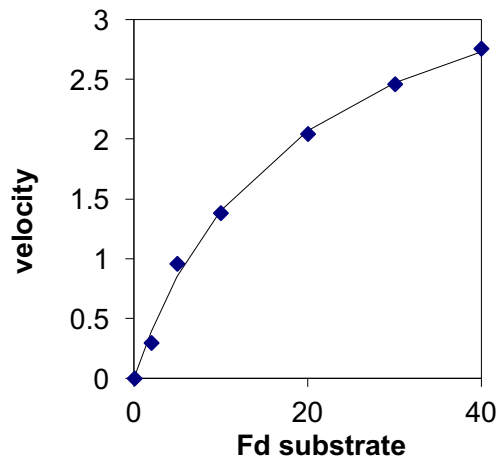

## Y314S 2 at NADPH50uM

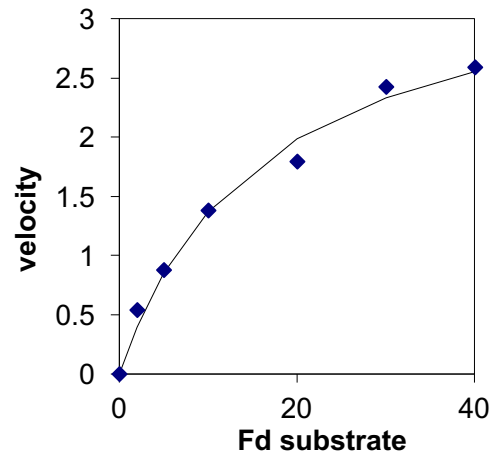

## Y314S 3 at NADPH50uM

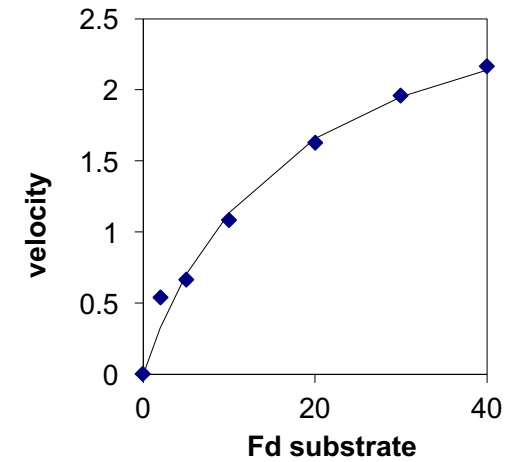

|                       | 1           | 2           | 3           | Average     | SD          |
|-----------------------|-------------|-------------|-------------|-------------|-------------|
| Km ( $\mu\text{M}$ )= | 18.57574261 | 16.05572332 | 16.4172826  | 17.01624951 | 1.112563203 |
| Vmax (e/s)=           | 3.998349116 | 3.57623833  | 3.019211861 | 3.531266435 | 0.40099401  |

# R235Q at 50 $\mu$ M NADPH

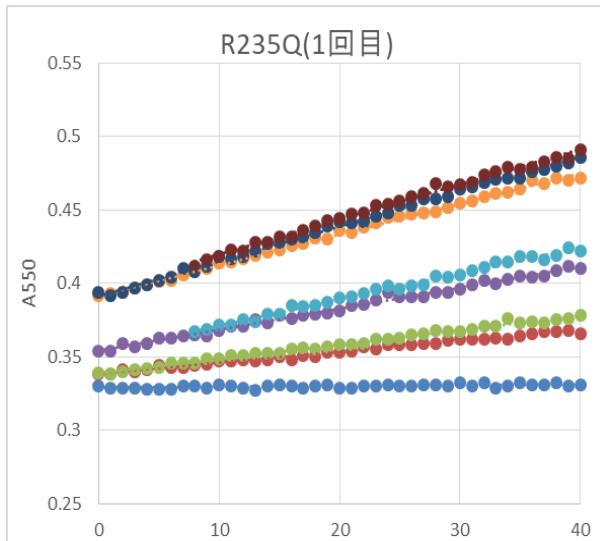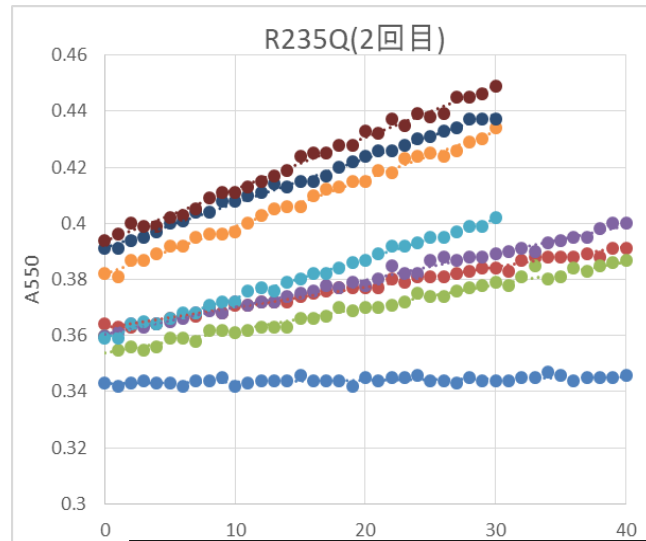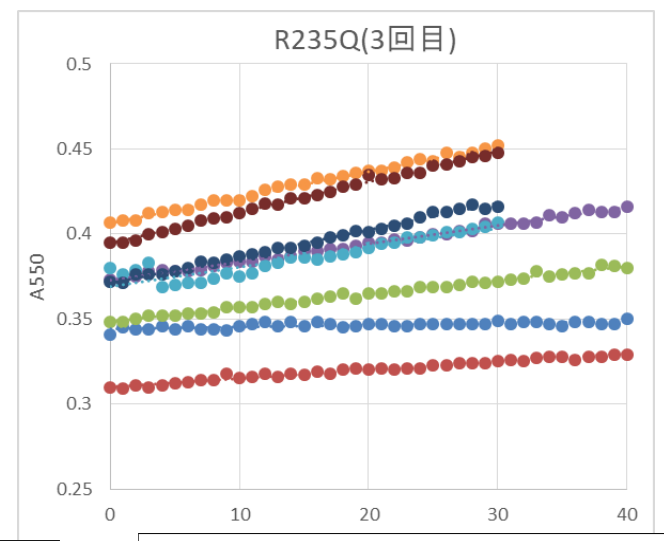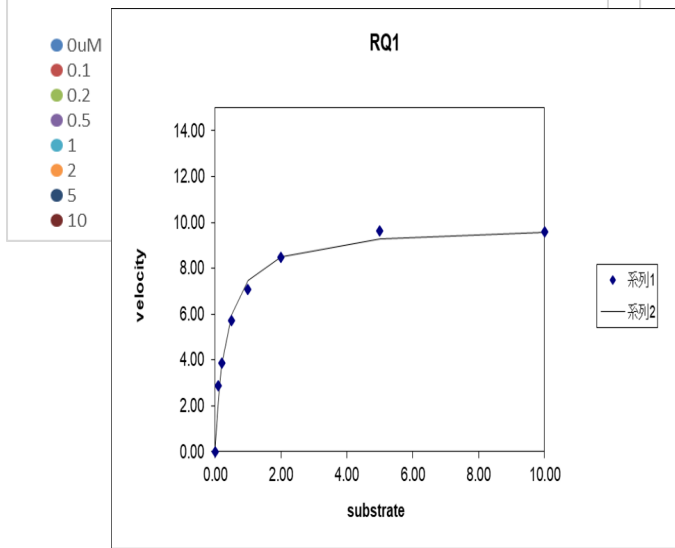

| Km    | Vmax  |
|-------|-------|
| 0.326 | 9.903 |

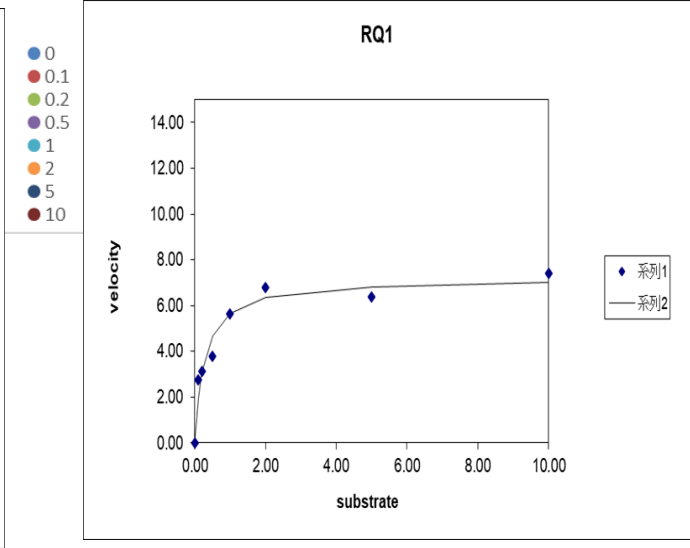

| Km    | Vmax  |
|-------|-------|
| 0.271 | 7.201 |

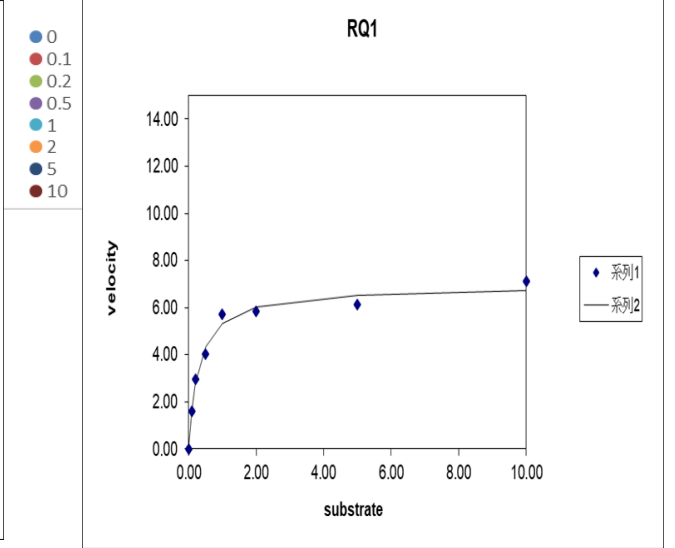

| Km    | Vmax  |
|-------|-------|
| 0.302 | 6.937 |

|       | Km ( $\mu$ M)      | Vmax (e/s)       |
|-------|--------------------|------------------|
| R235Q | 0.299 $\pm$ 0.0225 | 8.014 $\pm$ 1.34 |

# R244Q at 50 $\mu\text{M}$ NADPH

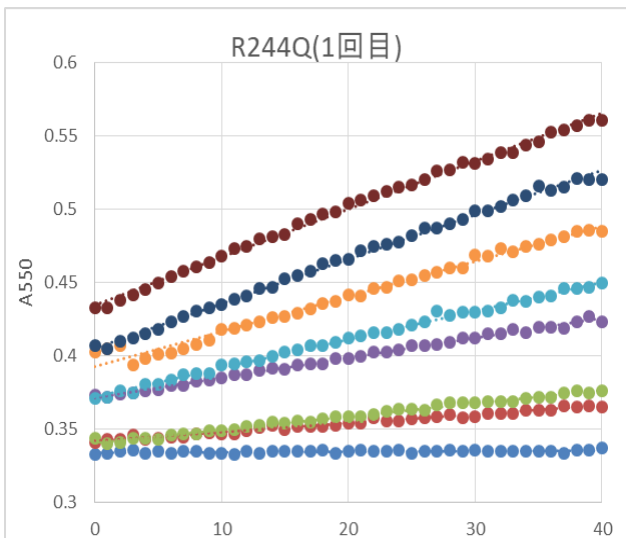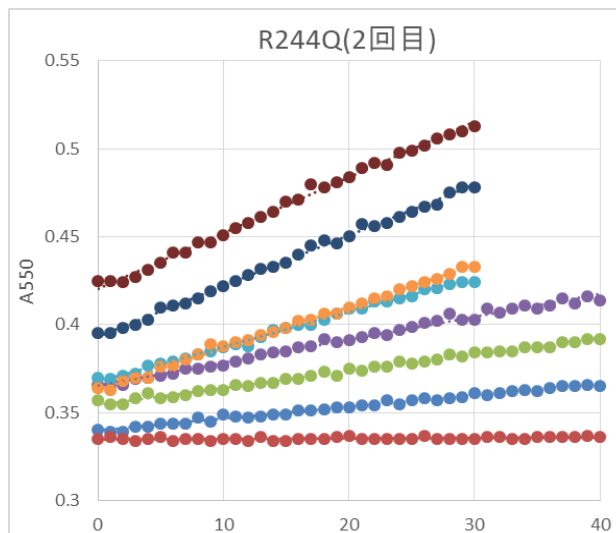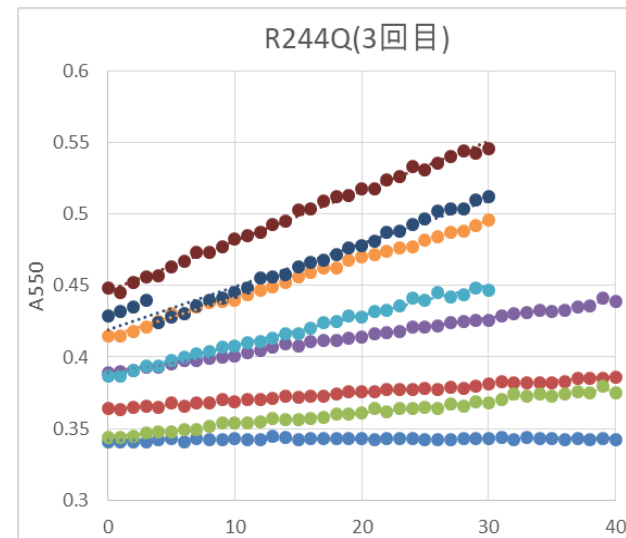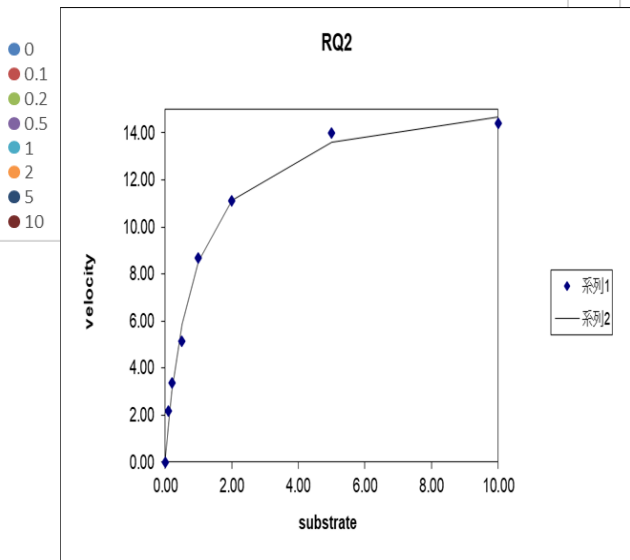

| Km    | Vmax   |
|-------|--------|
| 0.725 | 14.198 |

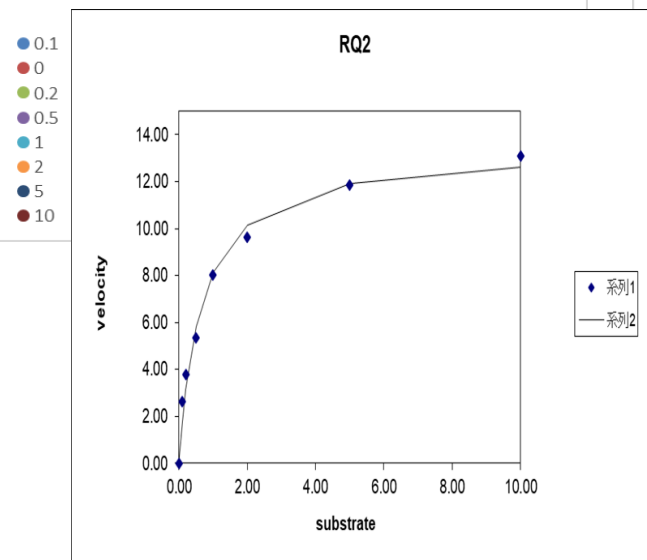

| Km    | Vmax  |
|-------|-------|
| 0.656 | 13.46 |

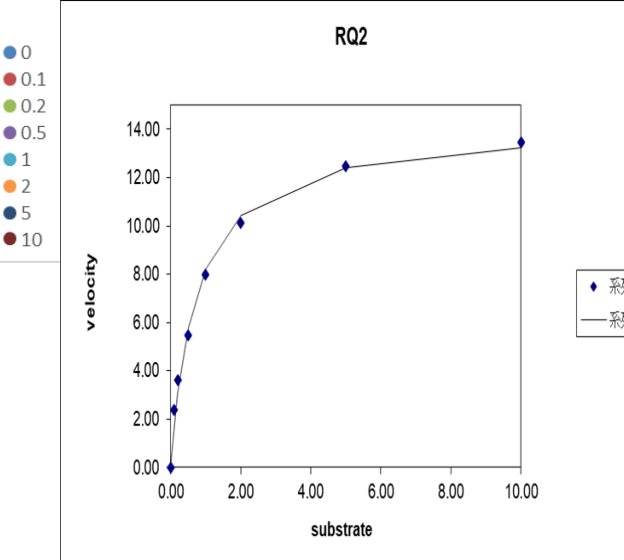

| Km    | Vmax  |
|-------|-------|
| 0.863 | 15.94 |

|       | Km ( $\mu\text{M}$ ) | Vmax (e/s)        |
|-------|----------------------|-------------------|
| R244Q | $0.748 \pm 0.086$    | $14.53 \pm 1.039$ |

# Cyt c reduction assay of wild-type FNR at 250 $\mu\text{M}$ NADPH

numbers below X-axis: concentration of LFd ( $\mu\text{M}$ )

WT1 at NADPH250uM

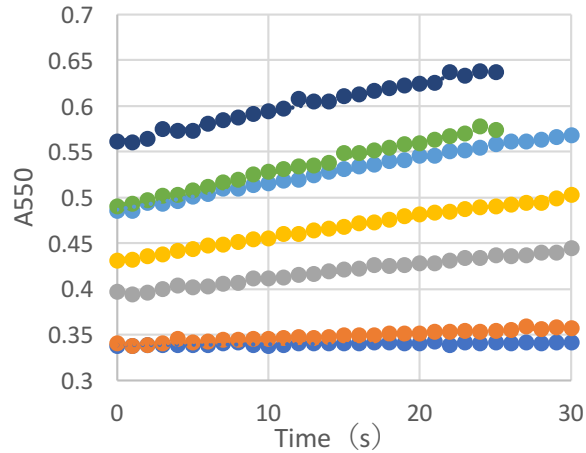

WT2 at NADPH250uM

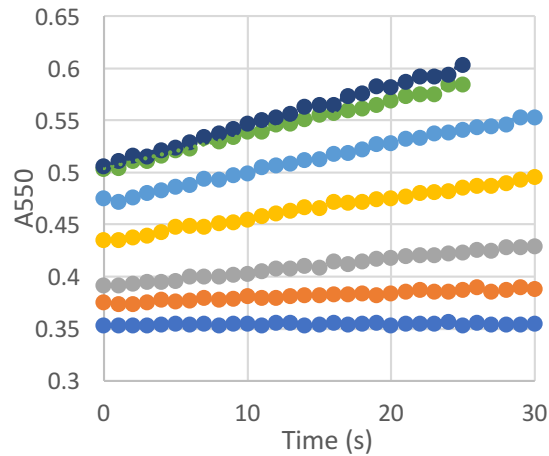

WT3 at NADPH250uM

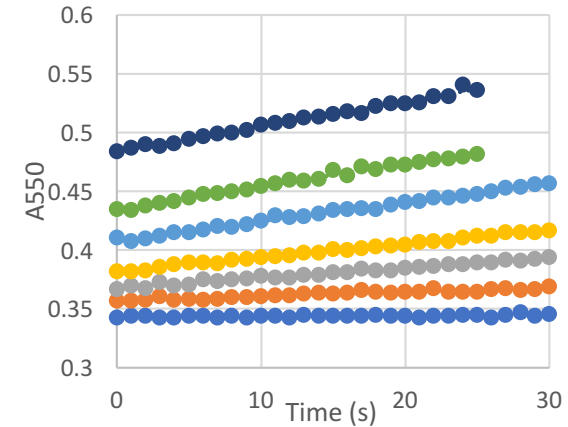

- 0
- 2
- 5
- 10
- 20
- 30
- 40

WT1 at NADPH250uM

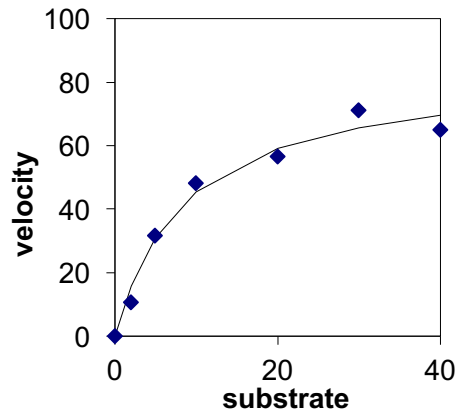

WT2 at NADPH250uM

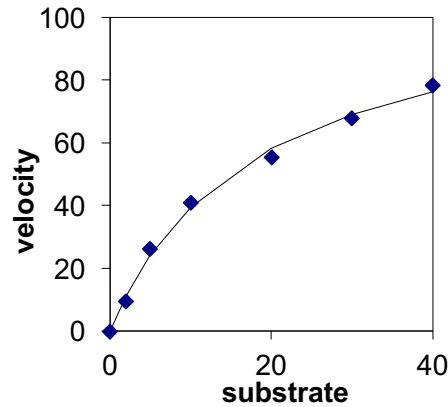

WT3 at NADPH250uM

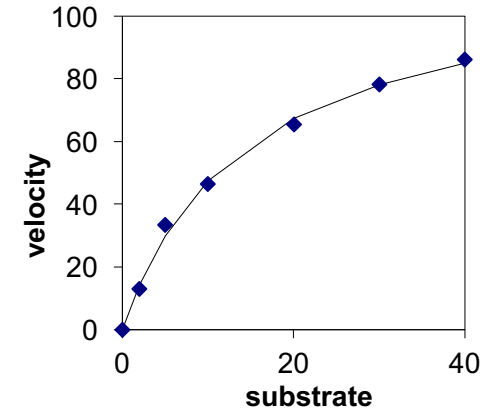

|                       | 1           | 2           | 3           | 4           | 5           | 6           | Average     | SD          |
|-----------------------|-------------|-------------|-------------|-------------|-------------|-------------|-------------|-------------|
| Km ( $\mu\text{M}$ )= | 8.689491789 | 17.93305898 | 14.22841464 | 9.493798154 | 11.22676394 | 10.17721815 | 11.95812428 | 3.19680672  |
| Vmax (e/s)=           | 84.69469387 | 110.5180254 | 115.255227  | 89.03628878 | 88.56470355 | 94.82963176 | 97.14976172 | 11.59426389 |

# cont. wild-type FNR at 250 $\mu\text{M}$ NADPH

WT4 at NADPH250uM

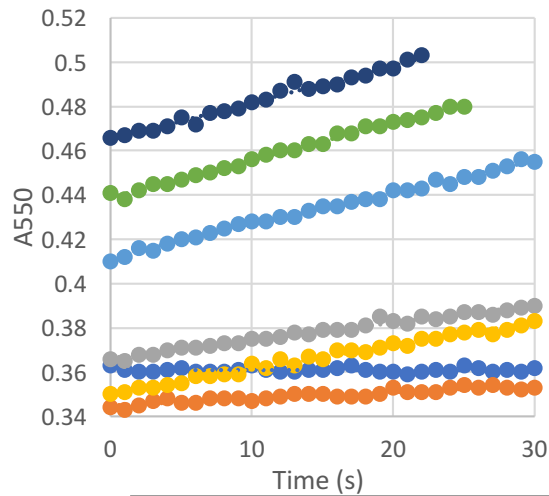

WT5 at NADPH250uM

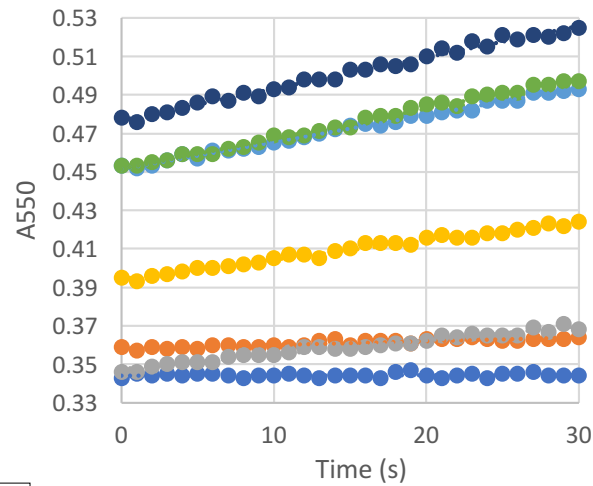

WT6 at 250  $\mu\text{M}$  NADPH

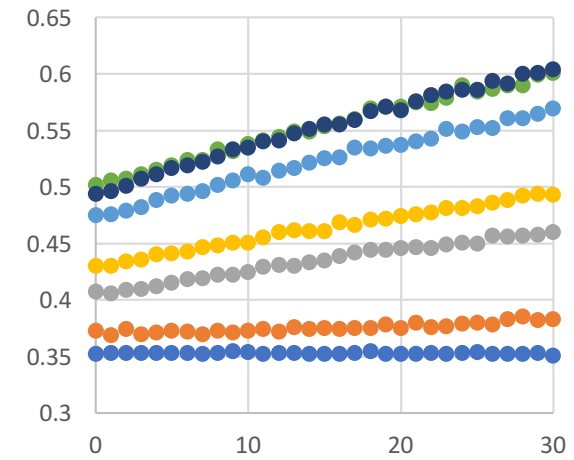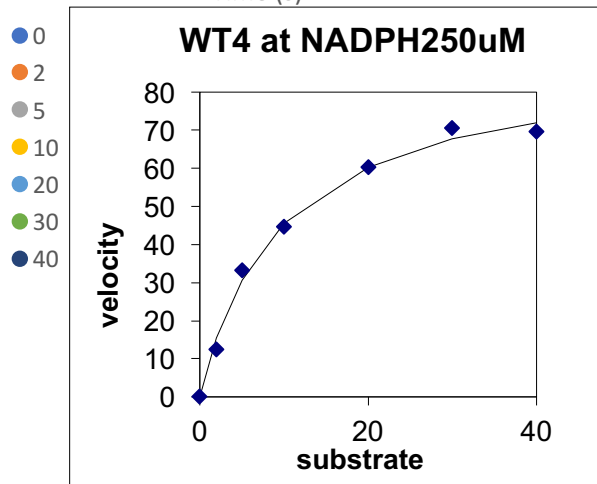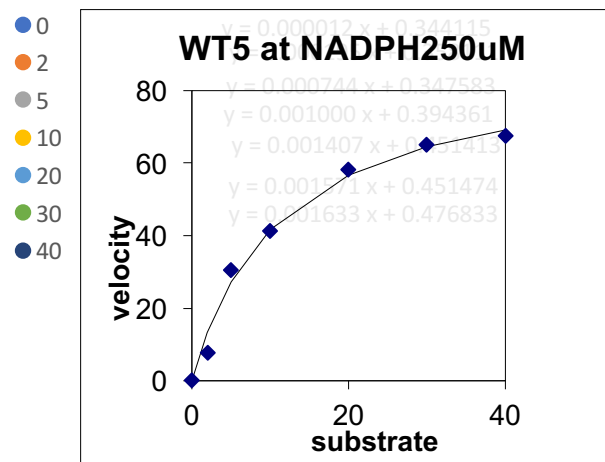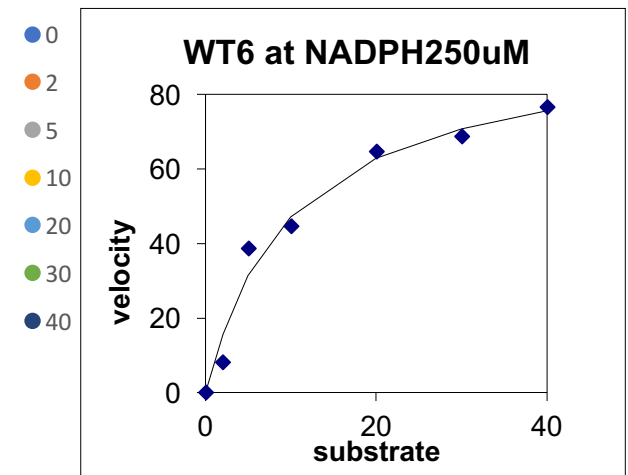

|                       | 1           | 2           | 3           | 4           | 5           | 6           | Average     | SD          |
|-----------------------|-------------|-------------|-------------|-------------|-------------|-------------|-------------|-------------|
| Km ( $\mu\text{M}$ )= | 8.689491789 | 17.93305898 | 14.22841464 | 9.493798154 | 11.22676394 | 10.17721815 | 11.95812428 | 3.19680672  |
| Vmax (e/s)=           | 84.69469387 | 110.5180254 | 115.255227  | 89.03628878 | 88.56470355 | 94.82963176 | 97.14976172 | 11.59426389 |

# Y314S at 250 $\mu$ M NADPH

## Y314S 1 at NADPH250 $\mu$ M

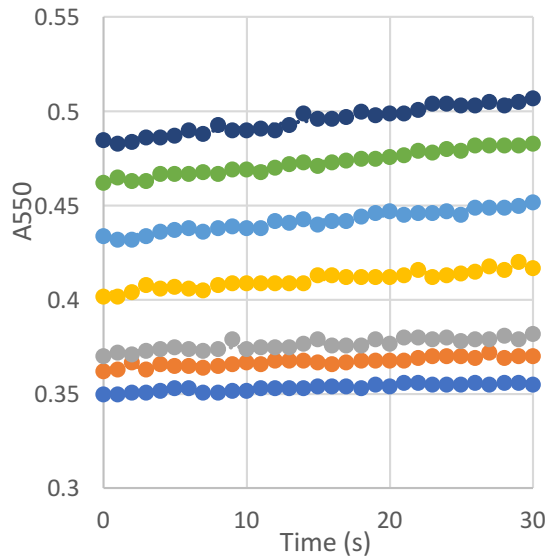

## Y314S 2 at NADPH250 $\mu$ M

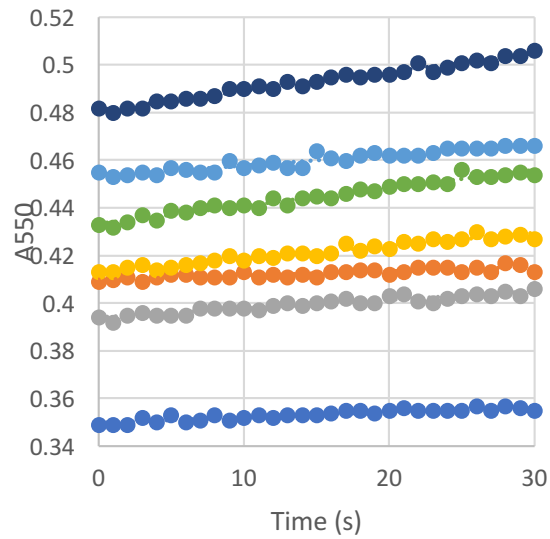

## Y314S 3 at NADPH250 $\mu$ M

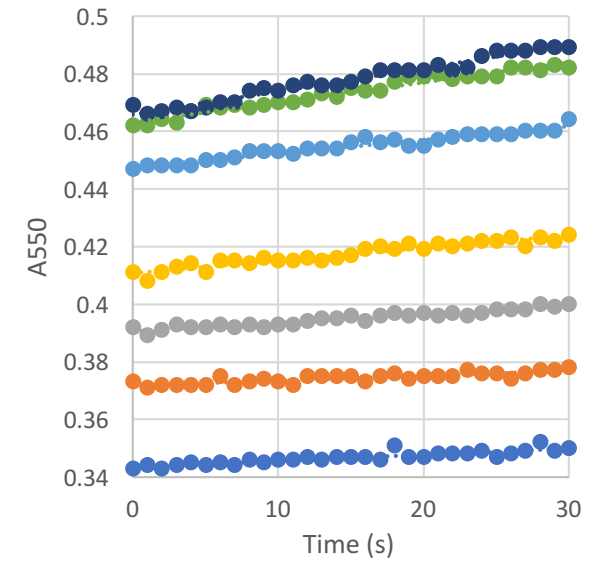

- 0
- 2
- 5
- 10
- 20
- 30
- 40

## Y314S 1 at NADPH250 $\mu$ M

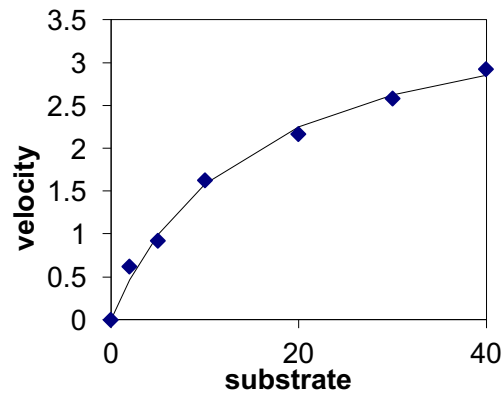

- 0
- 2
- 5
- 10
- 20
- 30
- 40

## Y314S 2 at NADPH250 $\mu$ M

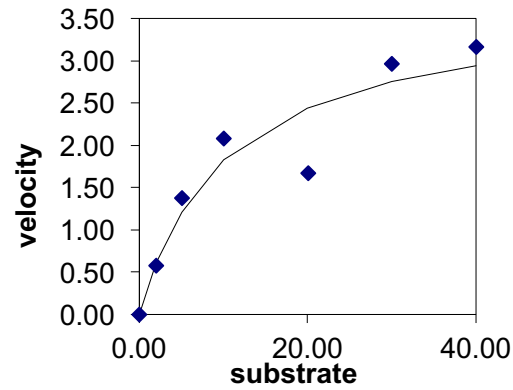

- 0
- 2
- 5
- 10
- 20
- 30
- 40

## Y314S 3 at NADPH250 $\mu$ M

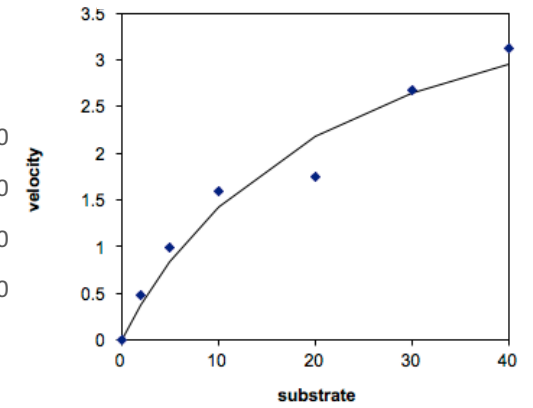

|                | 1           | 2           | 3           | 4           | 5           | Average     | SD          |
|----------------|-------------|-------------|-------------|-------------|-------------|-------------|-------------|
| Km ( $\mu$ M)= | 14.62476831 | 9.402317583 | 17.56002178 | 14.13793672 | 10.16145187 | 13.17729925 | 3.019008771 |
| Vmax (e/s)=    | 3.893403135 | 3.919003592 | 4.383900253 | 2.96273729  | 2.968351895 | 3.625479233 | 0.566424829 |

# cont. Y314S at 250 $\mu$ M NADPH

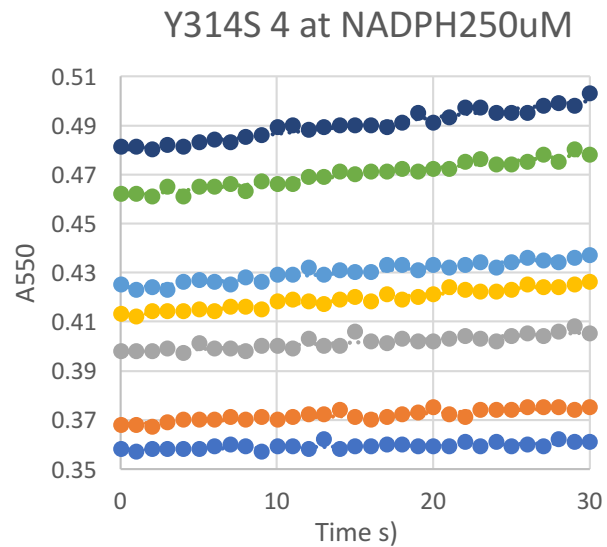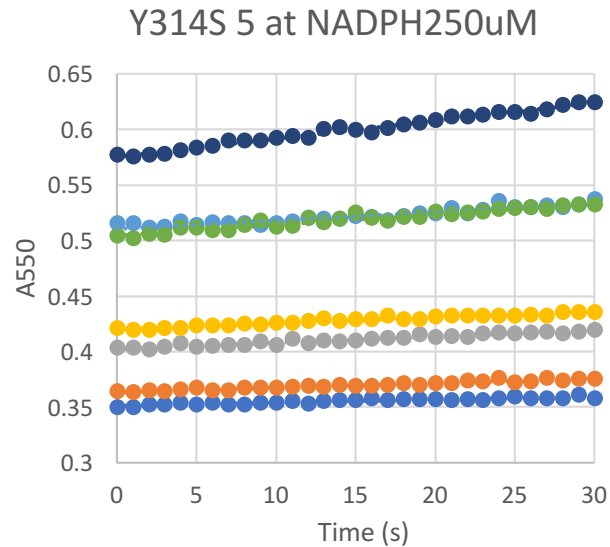

- 0
- 2
- 5
- 10
- 20
- 30
- 40

- 0
- 2
- 5
- 10
- 20
- 30
- 40

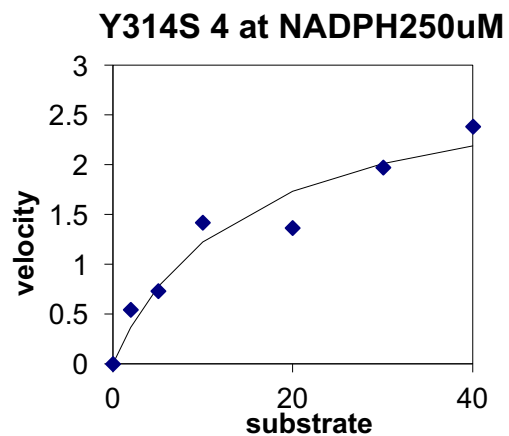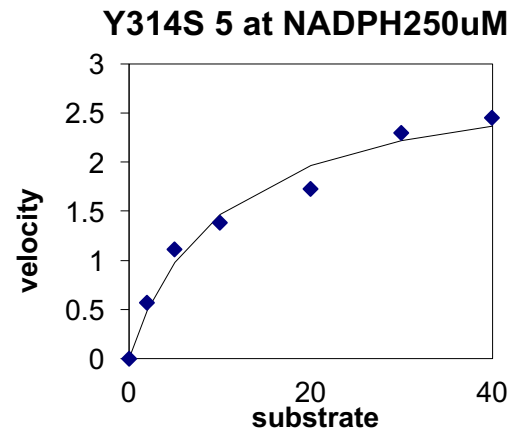

|                | 1           | 2           | 3           | 4           | 5           | Average     | SD          |
|----------------|-------------|-------------|-------------|-------------|-------------|-------------|-------------|
| Km ( $\mu$ M)= | 14.62476831 | 9.402317583 | 17.56002178 | 14.13793672 | 10.16145187 | 13.17729925 | 3.019008771 |
| Vmax (e/s)=    | 3.893403135 | 3.919003592 | 4.383900253 | 2.96273729  | 2.968351895 | 3.625479233 | 0.566424829 |



# R235Q at 250 μM NADPH

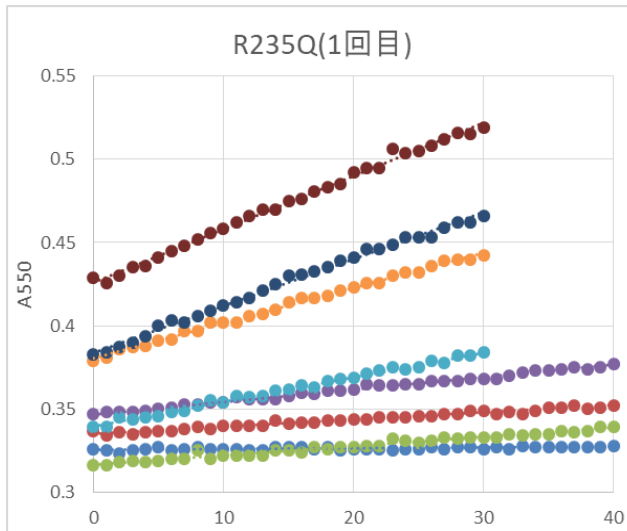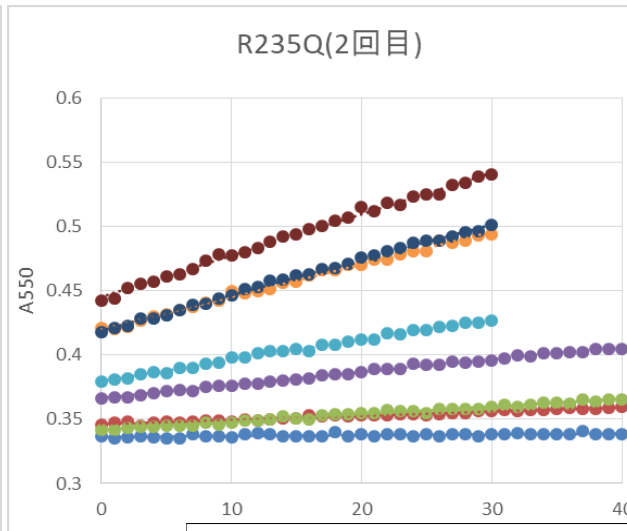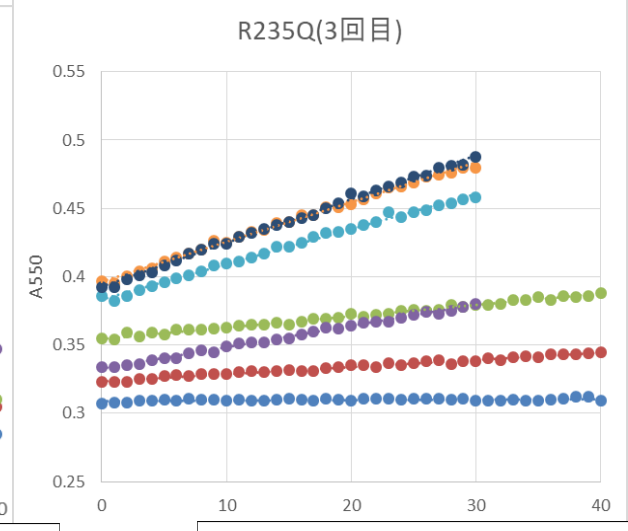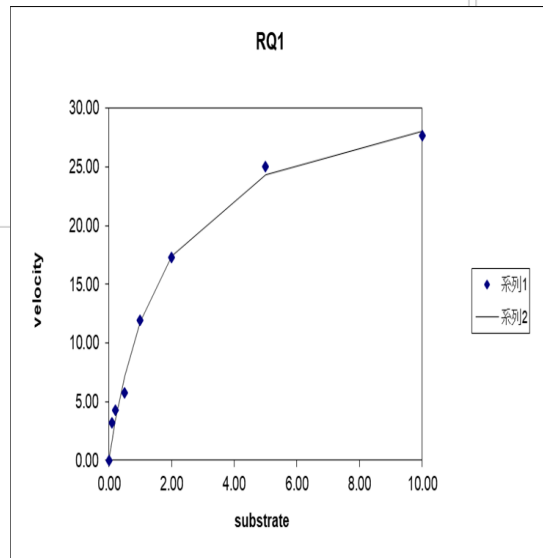

Km 1.8055 Vmax 33.1264

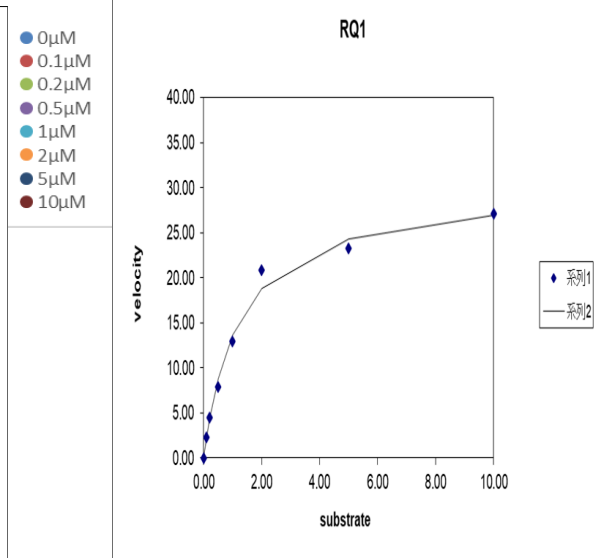

Km 1.226472 Vmax 30.29722

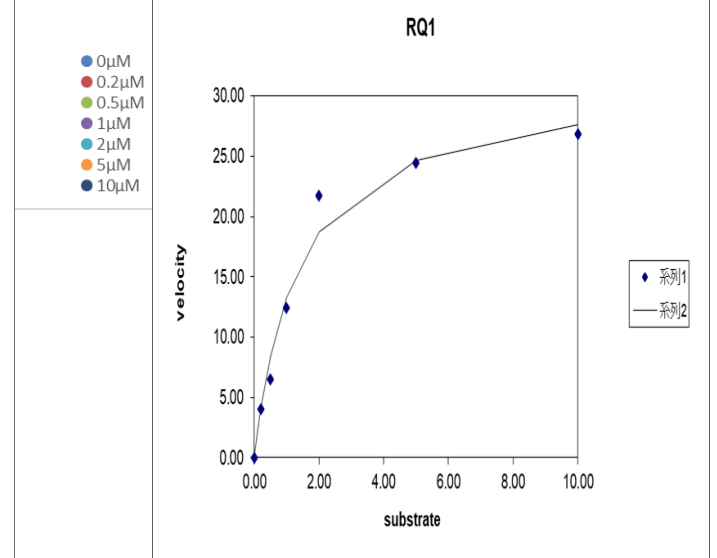

Km 1.359240 Vmax 31.413

|       | Km (μM)    | Vmax (e/s) |
|-------|------------|------------|
| R235Q | 1.464±0.25 | 31.61±1.16 |

# R244Q at 250 μM NADPH

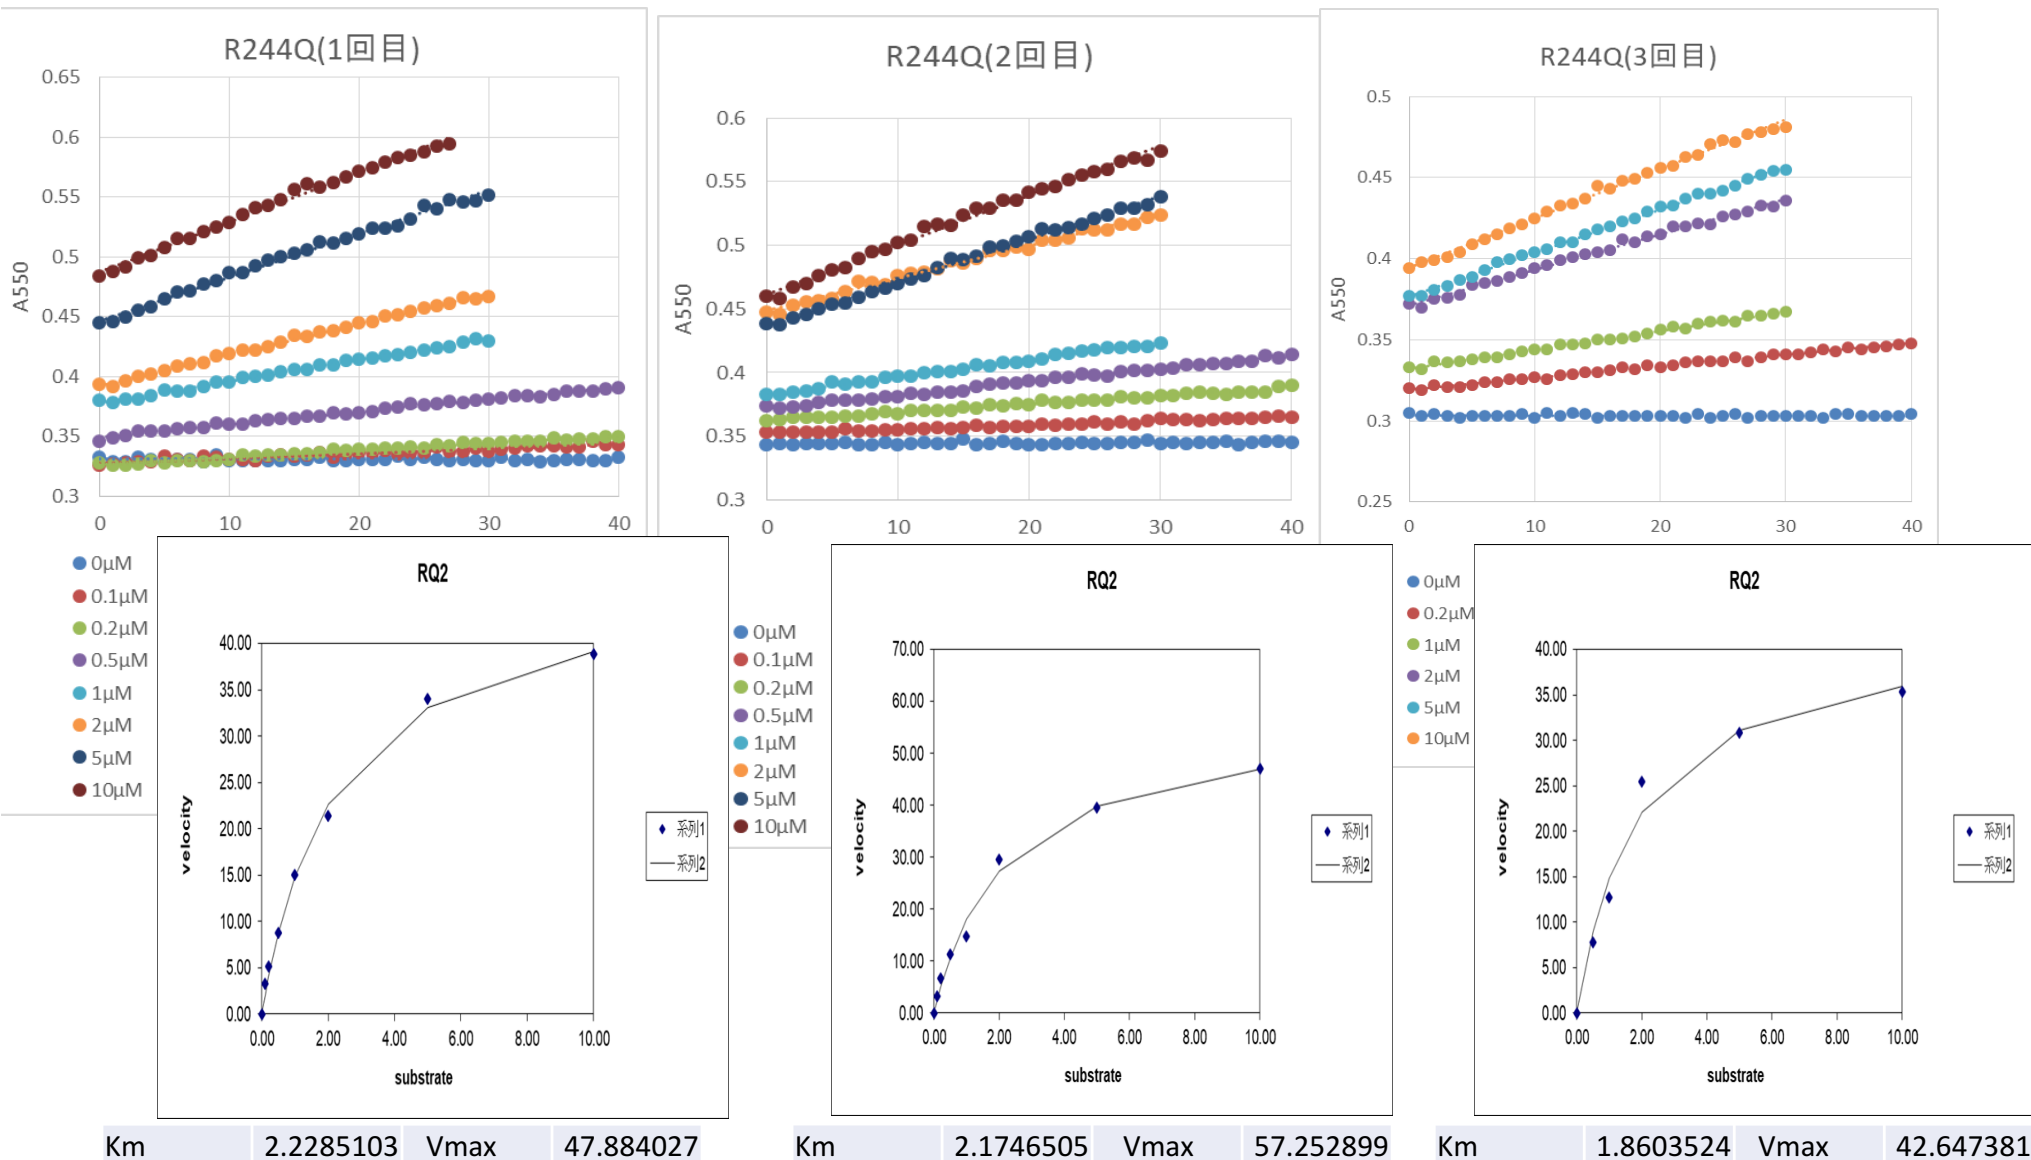

|       | Km (μM)    | Vmax (e/s) |
|-------|------------|------------|
| R244Q | 2.089±0.16 | 49.26±6.04 |

# Cyt c reduction assay of wild-type FNR at 500 $\mu\text{M}$ NADPH

numbers below X-axis: concentration of LFd ( $\mu\text{M}$ )

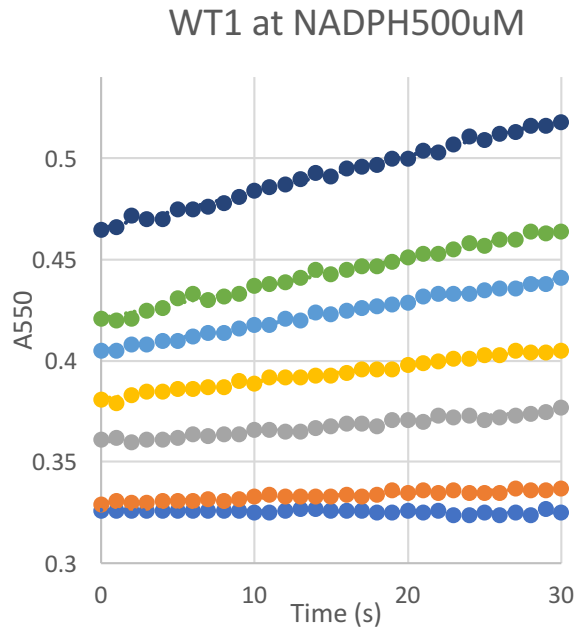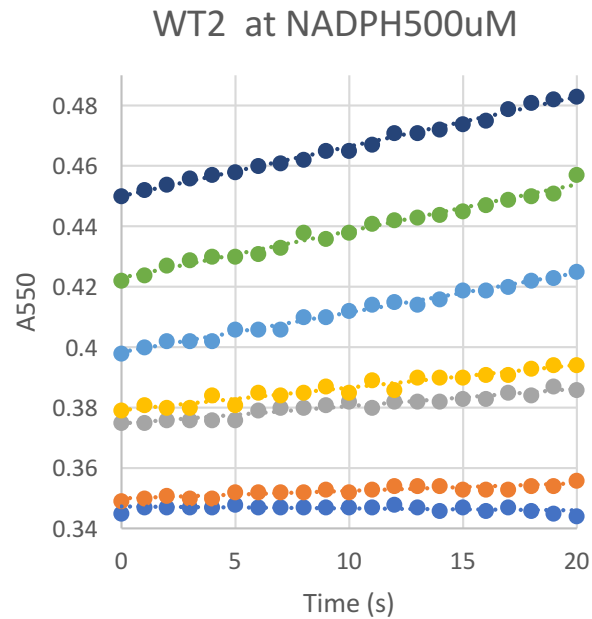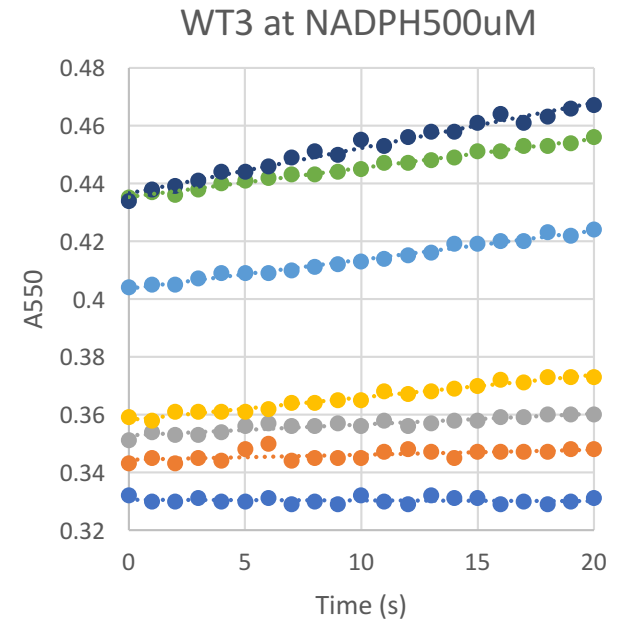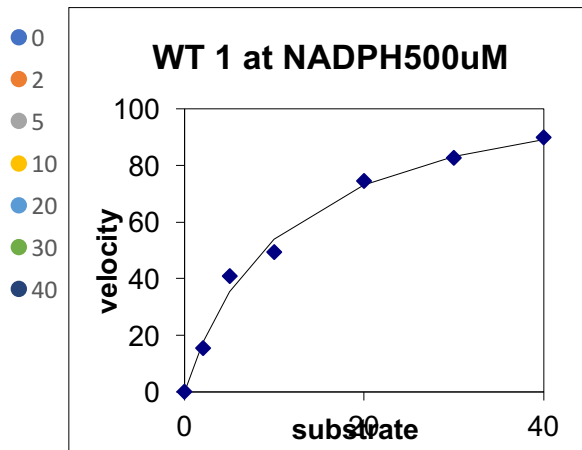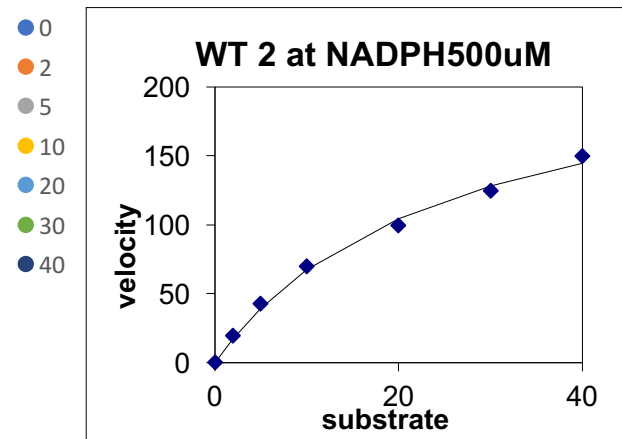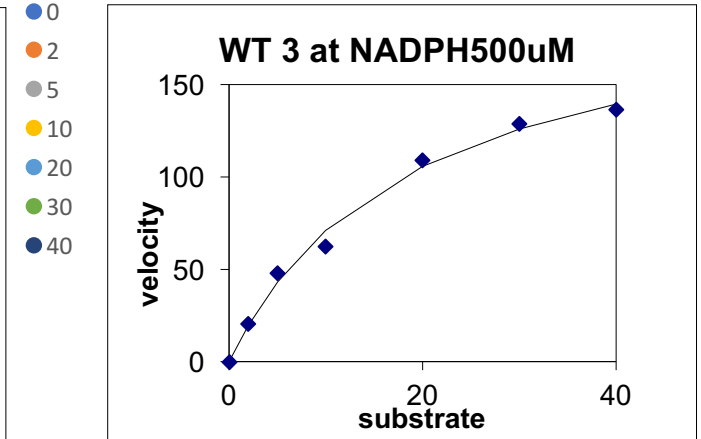

|                       | 1           | 2           | 3           | Average     | SD          |
|-----------------------|-------------|-------------|-------------|-------------|-------------|
| Km ( $\mu\text{M}$ )= | 24.74936223 | 18.9303608  | 23.3389757  | 22.33956624 | 2.478481906 |
| Vmax (e/s)=           | 234.1982587 | 205.4605673 | 184.2837461 | 207.9808574 | 20.45529335 |

# Y314S at 500 $\mu$ M NADPH

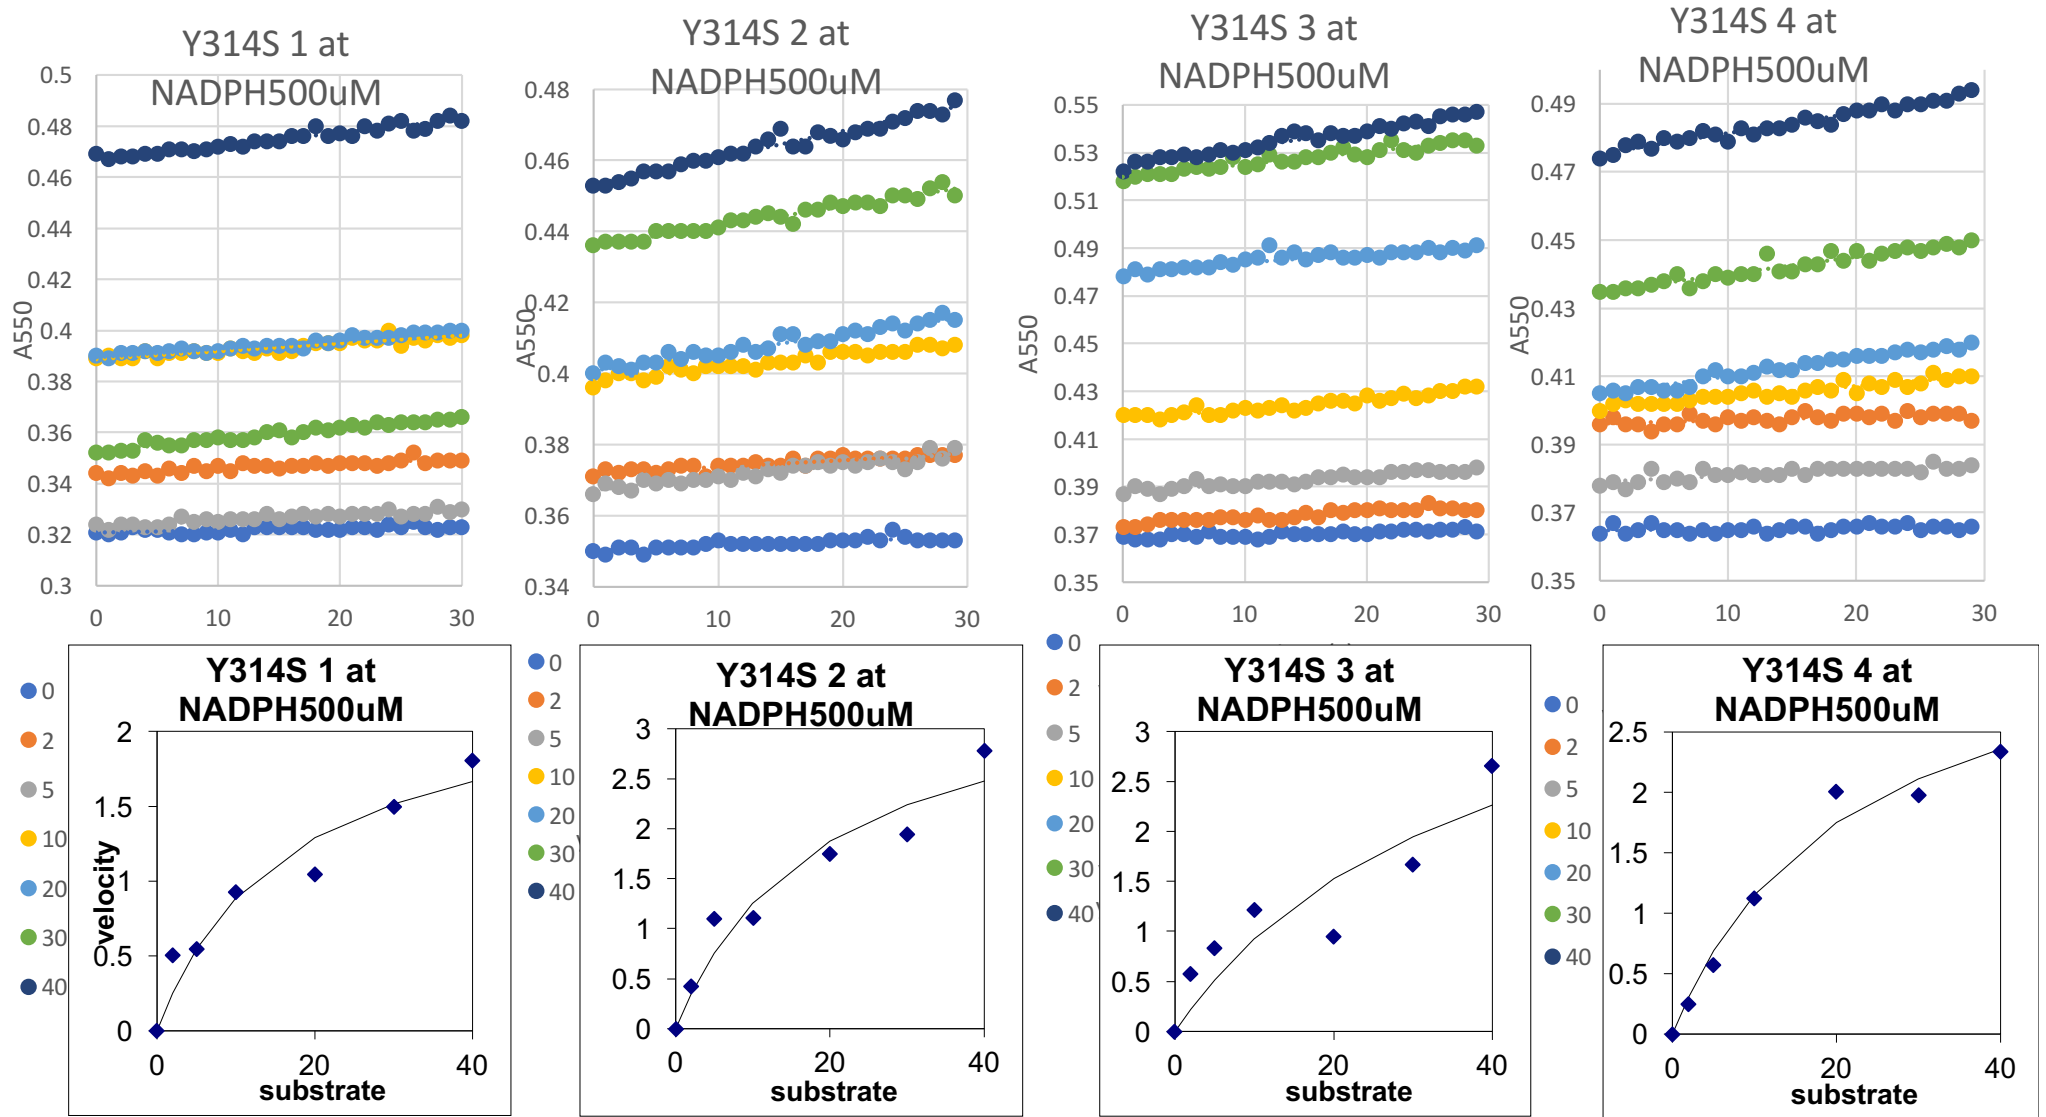

|                | 1           | 2           | 3           | 4           | Average     | SD         |
|----------------|-------------|-------------|-------------|-------------|-------------|------------|
| Km ( $\mu$ M)= | 16.62000622 | 19.13092072 | 15.60011307 | 21.27594863 | 18.15674716 | 2.2122603  |
| Vmax (e/s)=    | 2.356690519 | 3.661335393 | 3.199938088 | 3.615057468 | 3.208255367 | 0.52345041 |

# R235Q at 500 μM NADPH

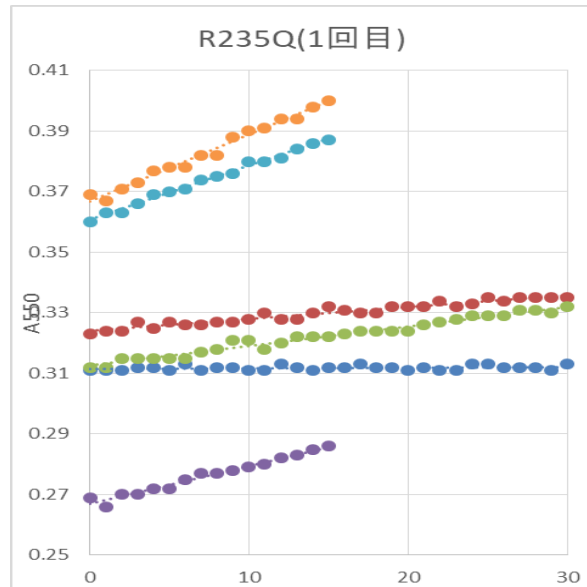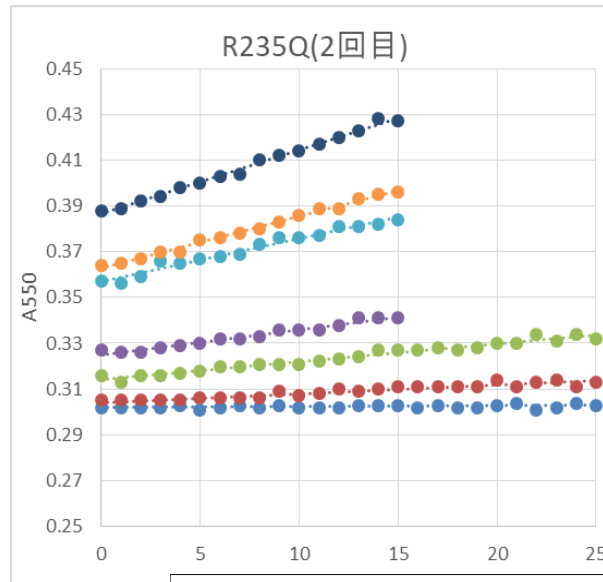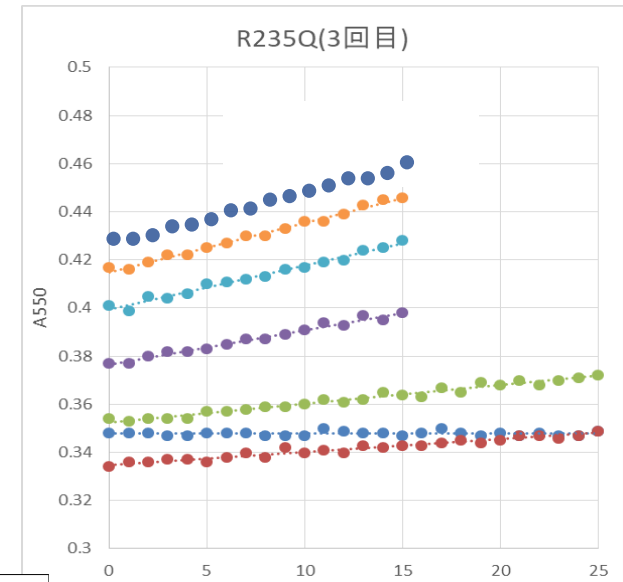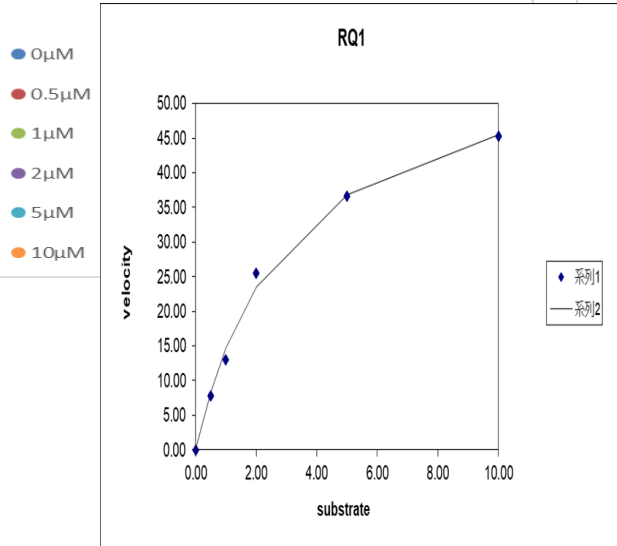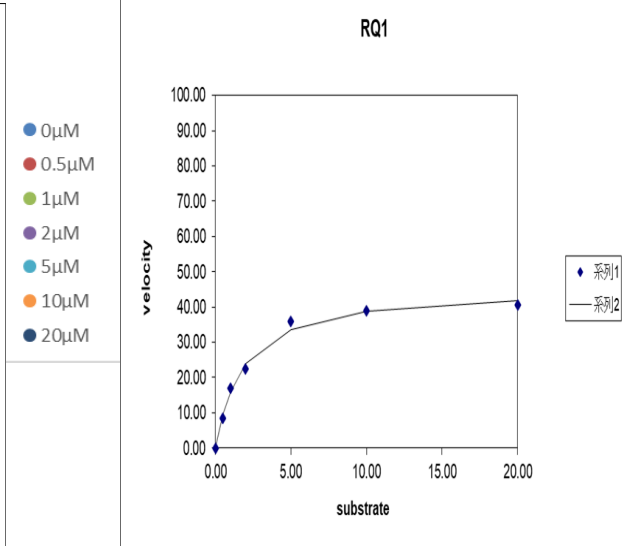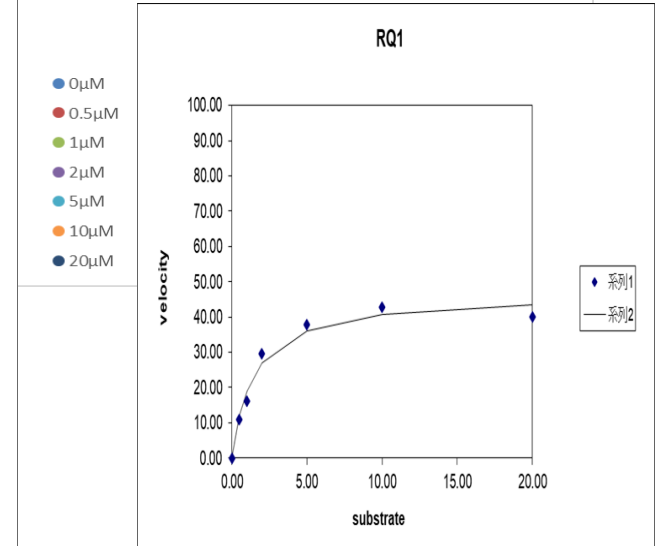

Km 3.045665 Vmax 59.35955

Km 1.838884 Vmax 45.81550

Km 1.430247 Vmax 46.47942

|       | Km (μM)    | Vmax (e/s) |
|-------|------------|------------|
| R235Q | 2.105±0.69 | 50.55±6.23 |

# R244Q at 500 μM NADPH

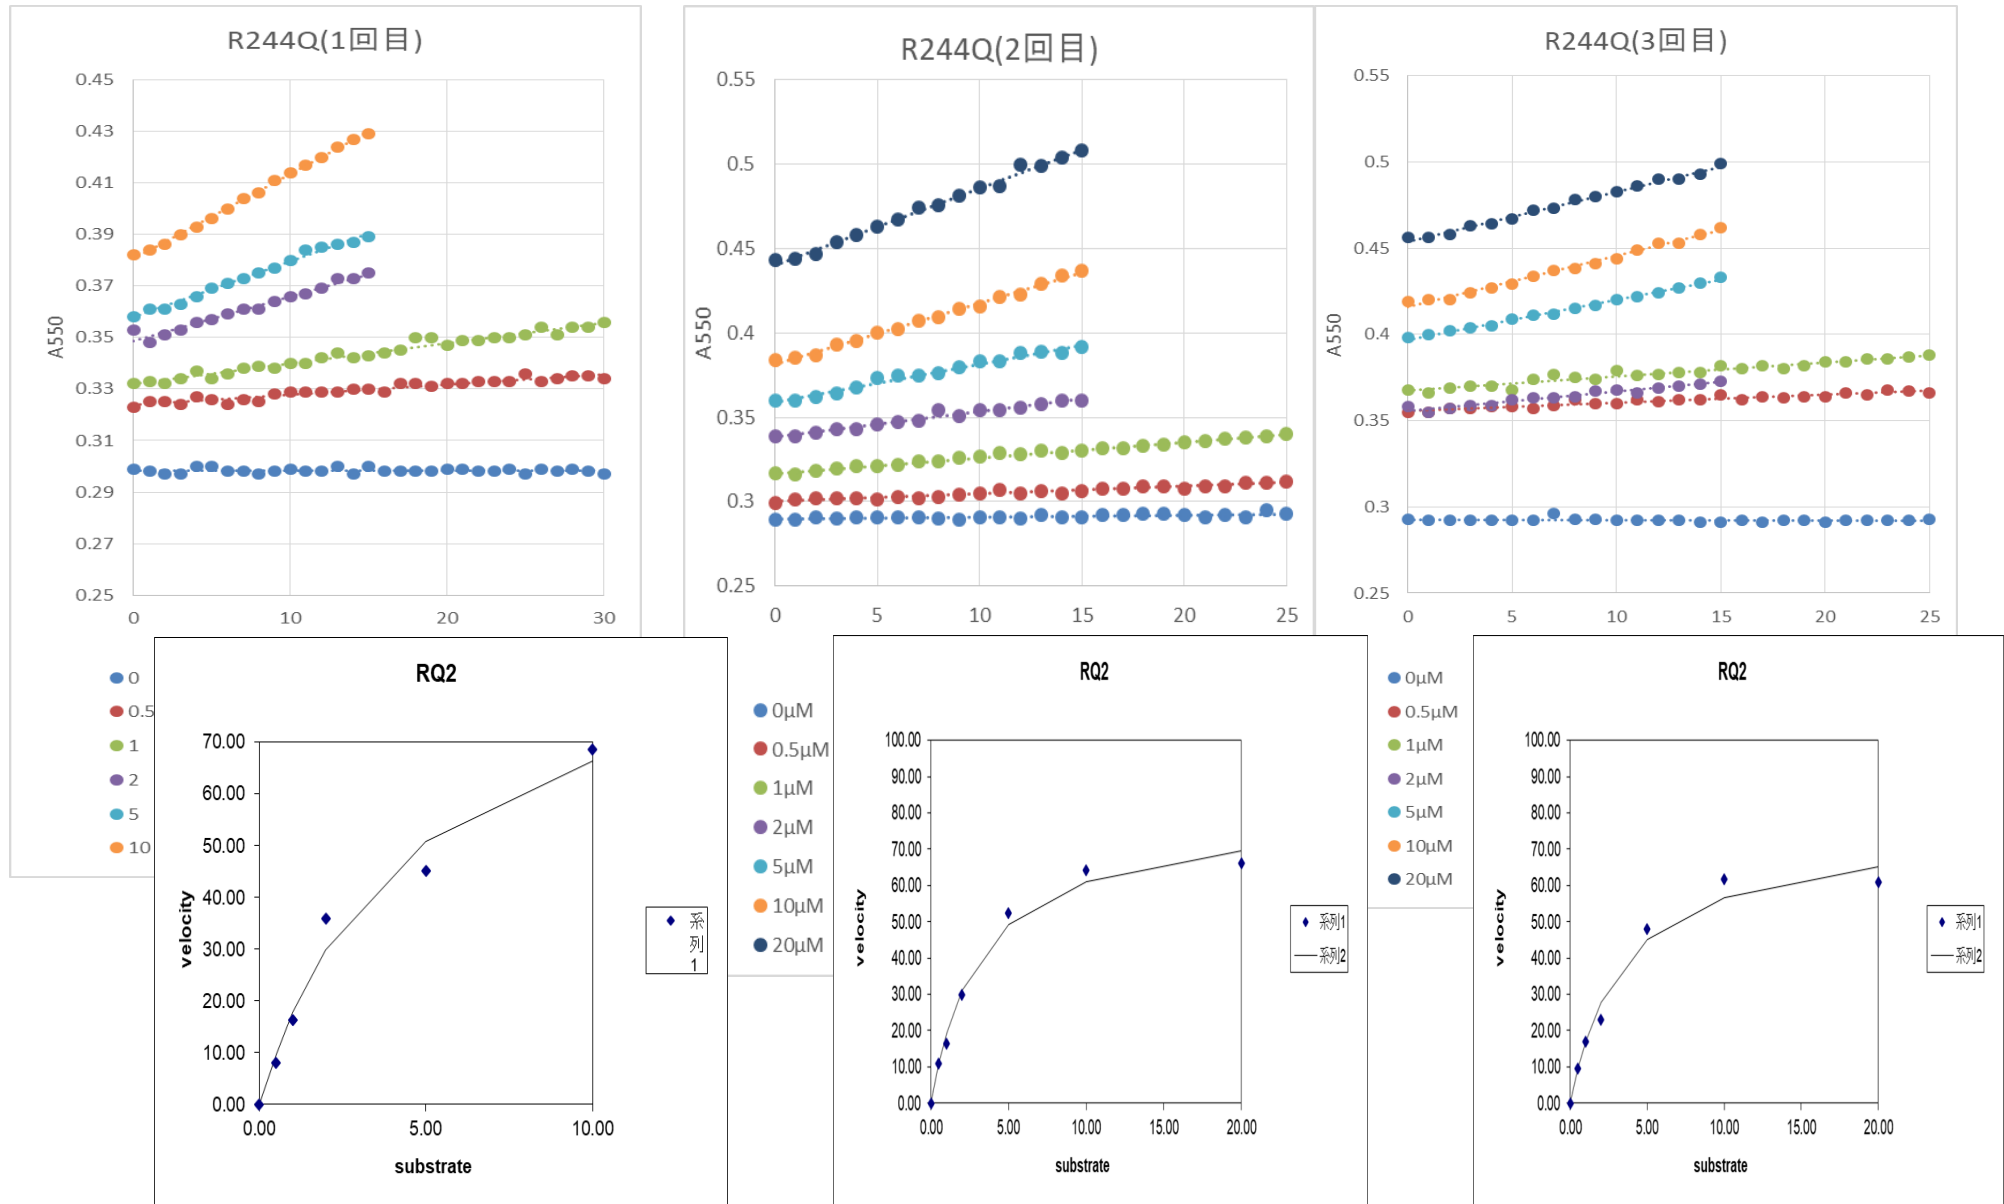

Km 4.400386 Vmax 95.640009

Km 3.14612 Vmax 80.3987

Km 3.4824 Vmax 76.4968

|       | Km (μM)    | Vmax (e/s) |
|-------|------------|------------|
| R244Q | 3.676±0.53 | 84.18±8.26 |

# Cyt c reduction assay of wild-type FNR at 1 mM NADPH

numbers below X-axis: concentration of LFd ( $\mu\text{M}$ )

WT1 at NADPH1mM

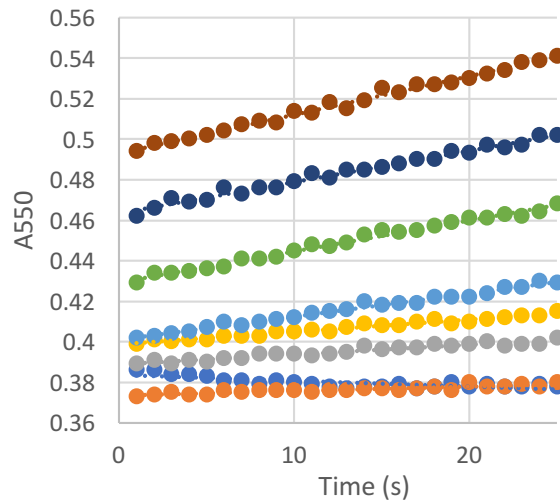

WT2 at NADPH1mM

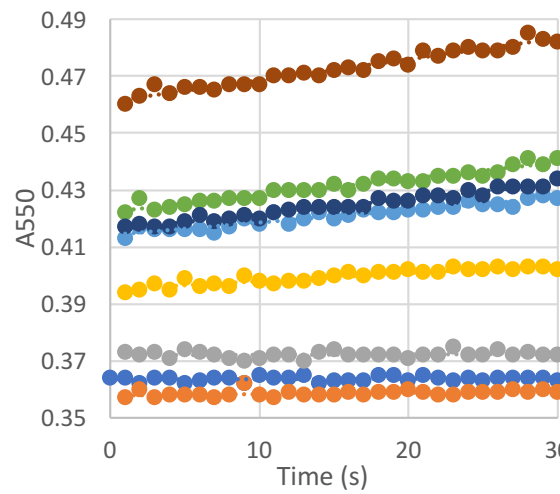

WT3 at NADPH1mM

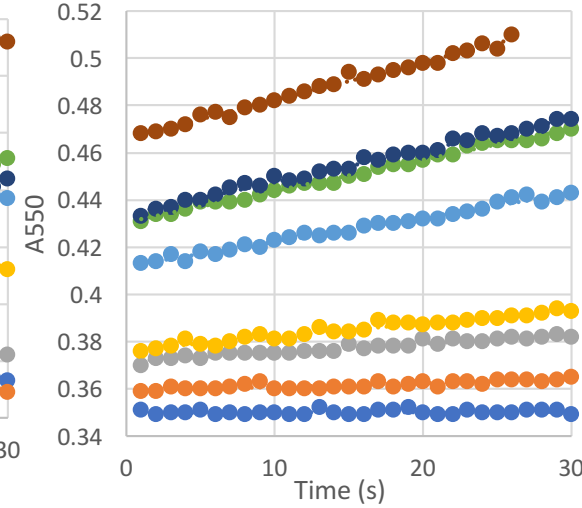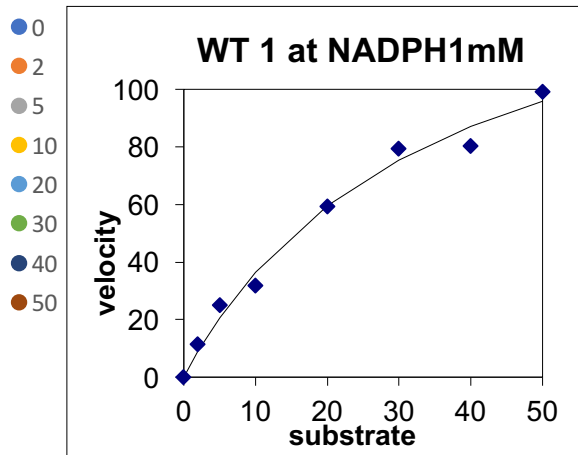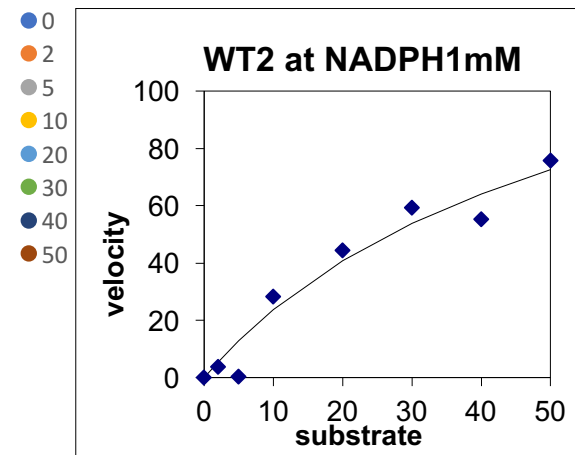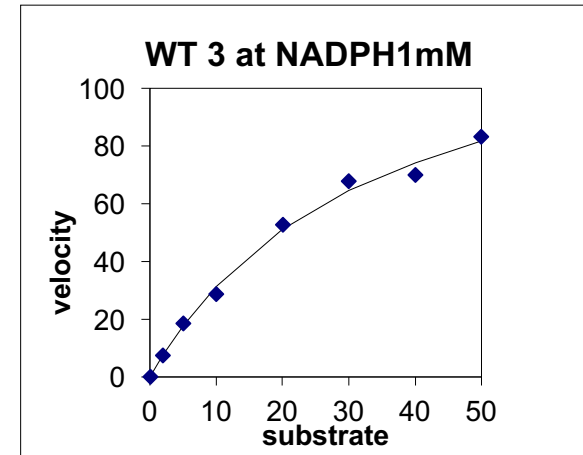

|                       | 1        | 2        | 3         | 4        | Average   | SD       |
|-----------------------|----------|----------|-----------|----------|-----------|----------|
| Km ( $\mu\text{M}$ )= | 34.27829 | 53.8883  | 33.434979 | 53.0924  | 43.673509 | 9.825431 |
| Vmax (e/s)=           | 161.5780 | 150.7595 | 136.44268 | 167.0709 | 153.9628  | 11.6943  |

# cont. wild-type FNR at 1 mM NADPH

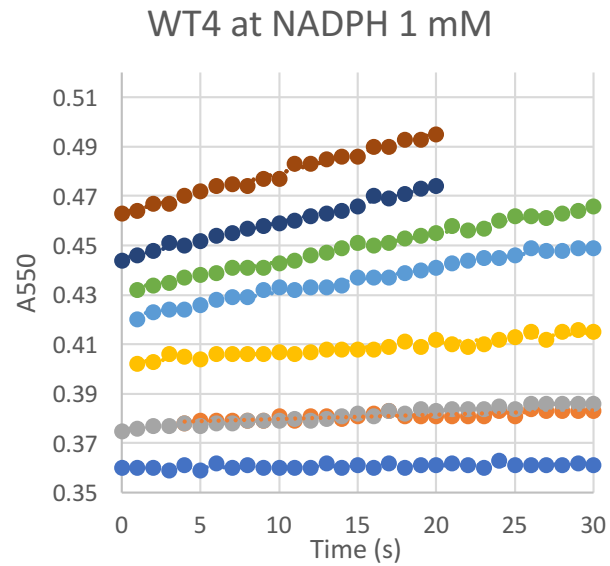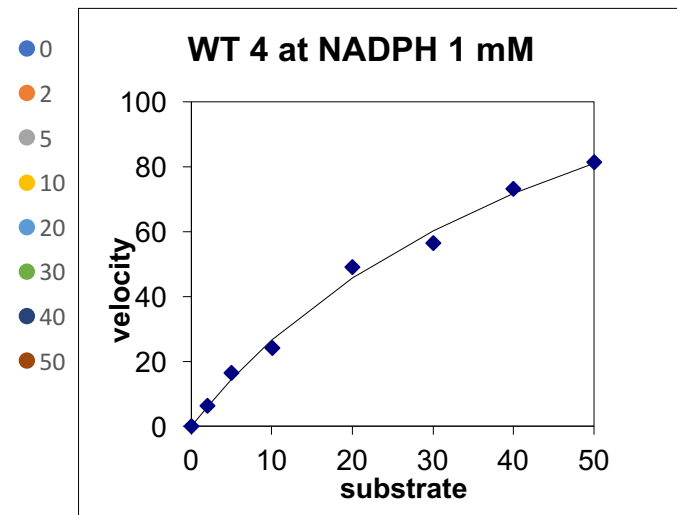

|                | 1        | 2        | 3         | 4        | Average   | SD       |
|----------------|----------|----------|-----------|----------|-----------|----------|
| Km ( $\mu$ M)= | 34.27829 | 53.8883  | 33.434979 | 53.0924  | 43.673509 | 9.825431 |
| Vmax (e/s)=    | 161.5780 | 150.7595 | 136.44268 | 167.0709 | 153.9628  | 11.6943  |



# R235Q at 1 mM NADPH

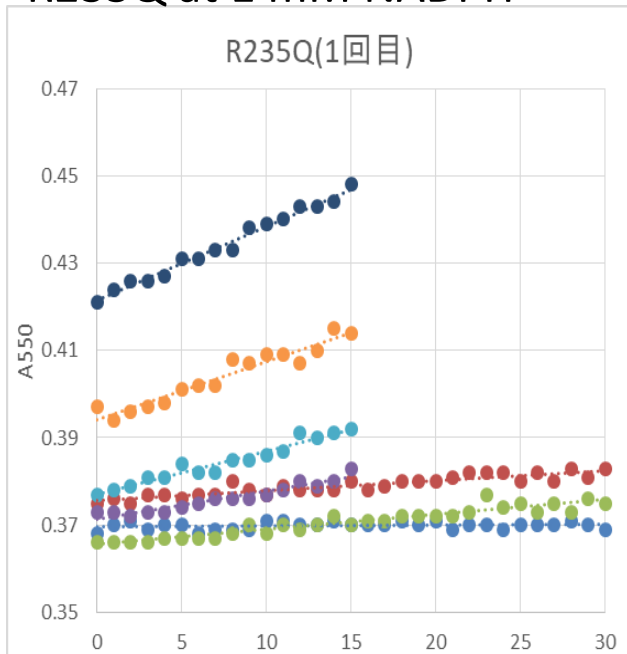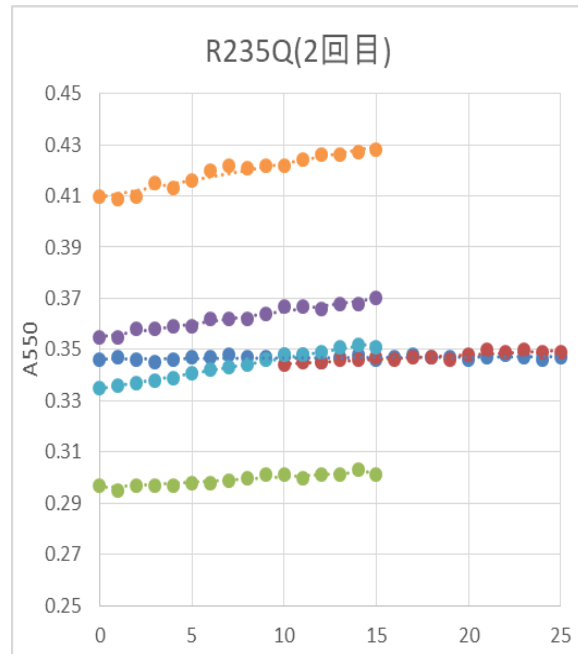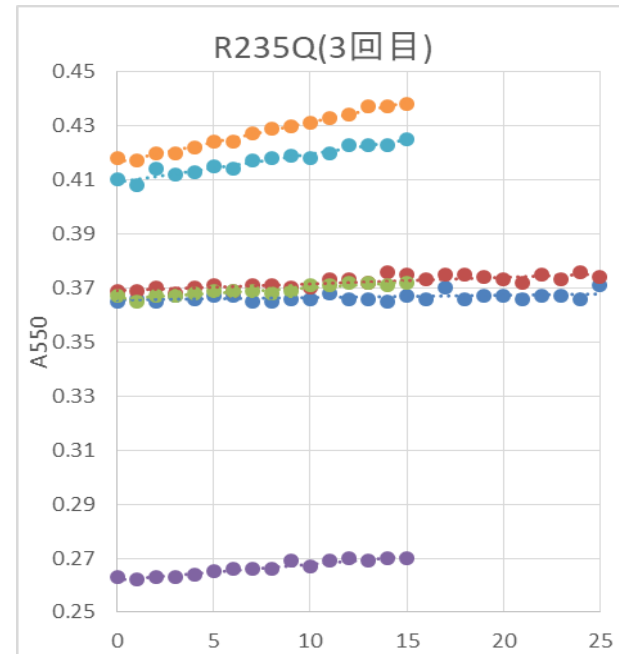

- 0 μM
- 0.5 μM
- 1 μM
- 2 μM
- 5 μM
- 10 μM
- 20 μM

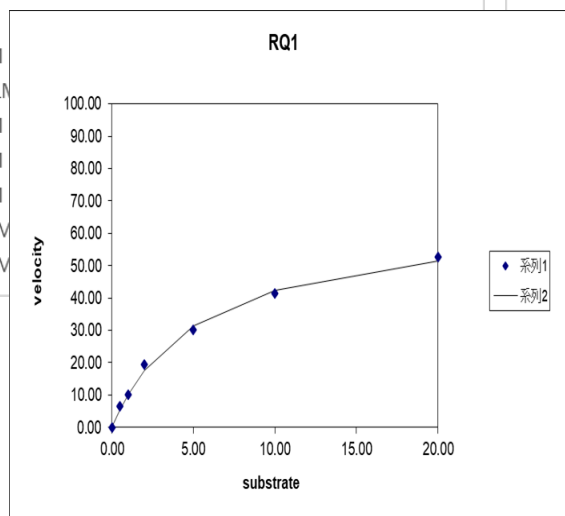

Km 5.42 Vmax 65.48

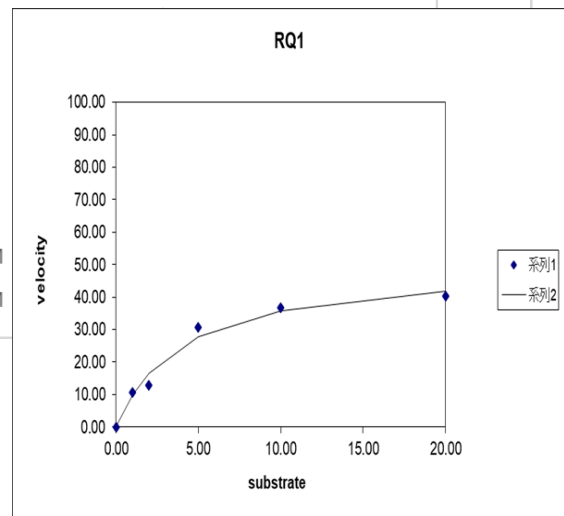

Km 4.1 Vmax 50.4

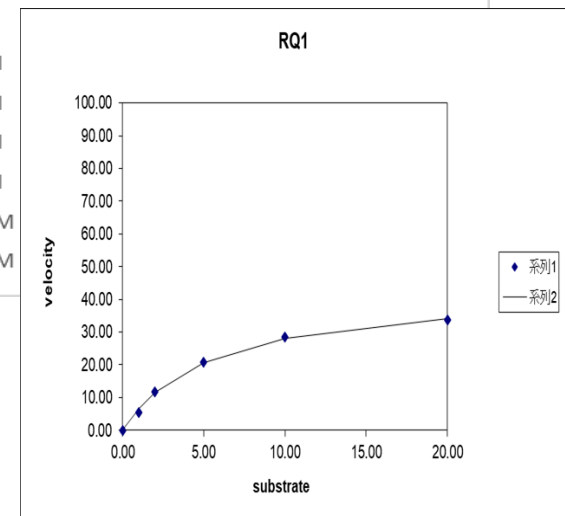

Km 5.61 Vmax 43.7

|            |            |
|------------|------------|
|            | R235Q      |
| Vmax (e/s) | 53.19±9.11 |
| Km (μM)    | 5.04±0.67  |

# R244Q at 1 mM NADPH

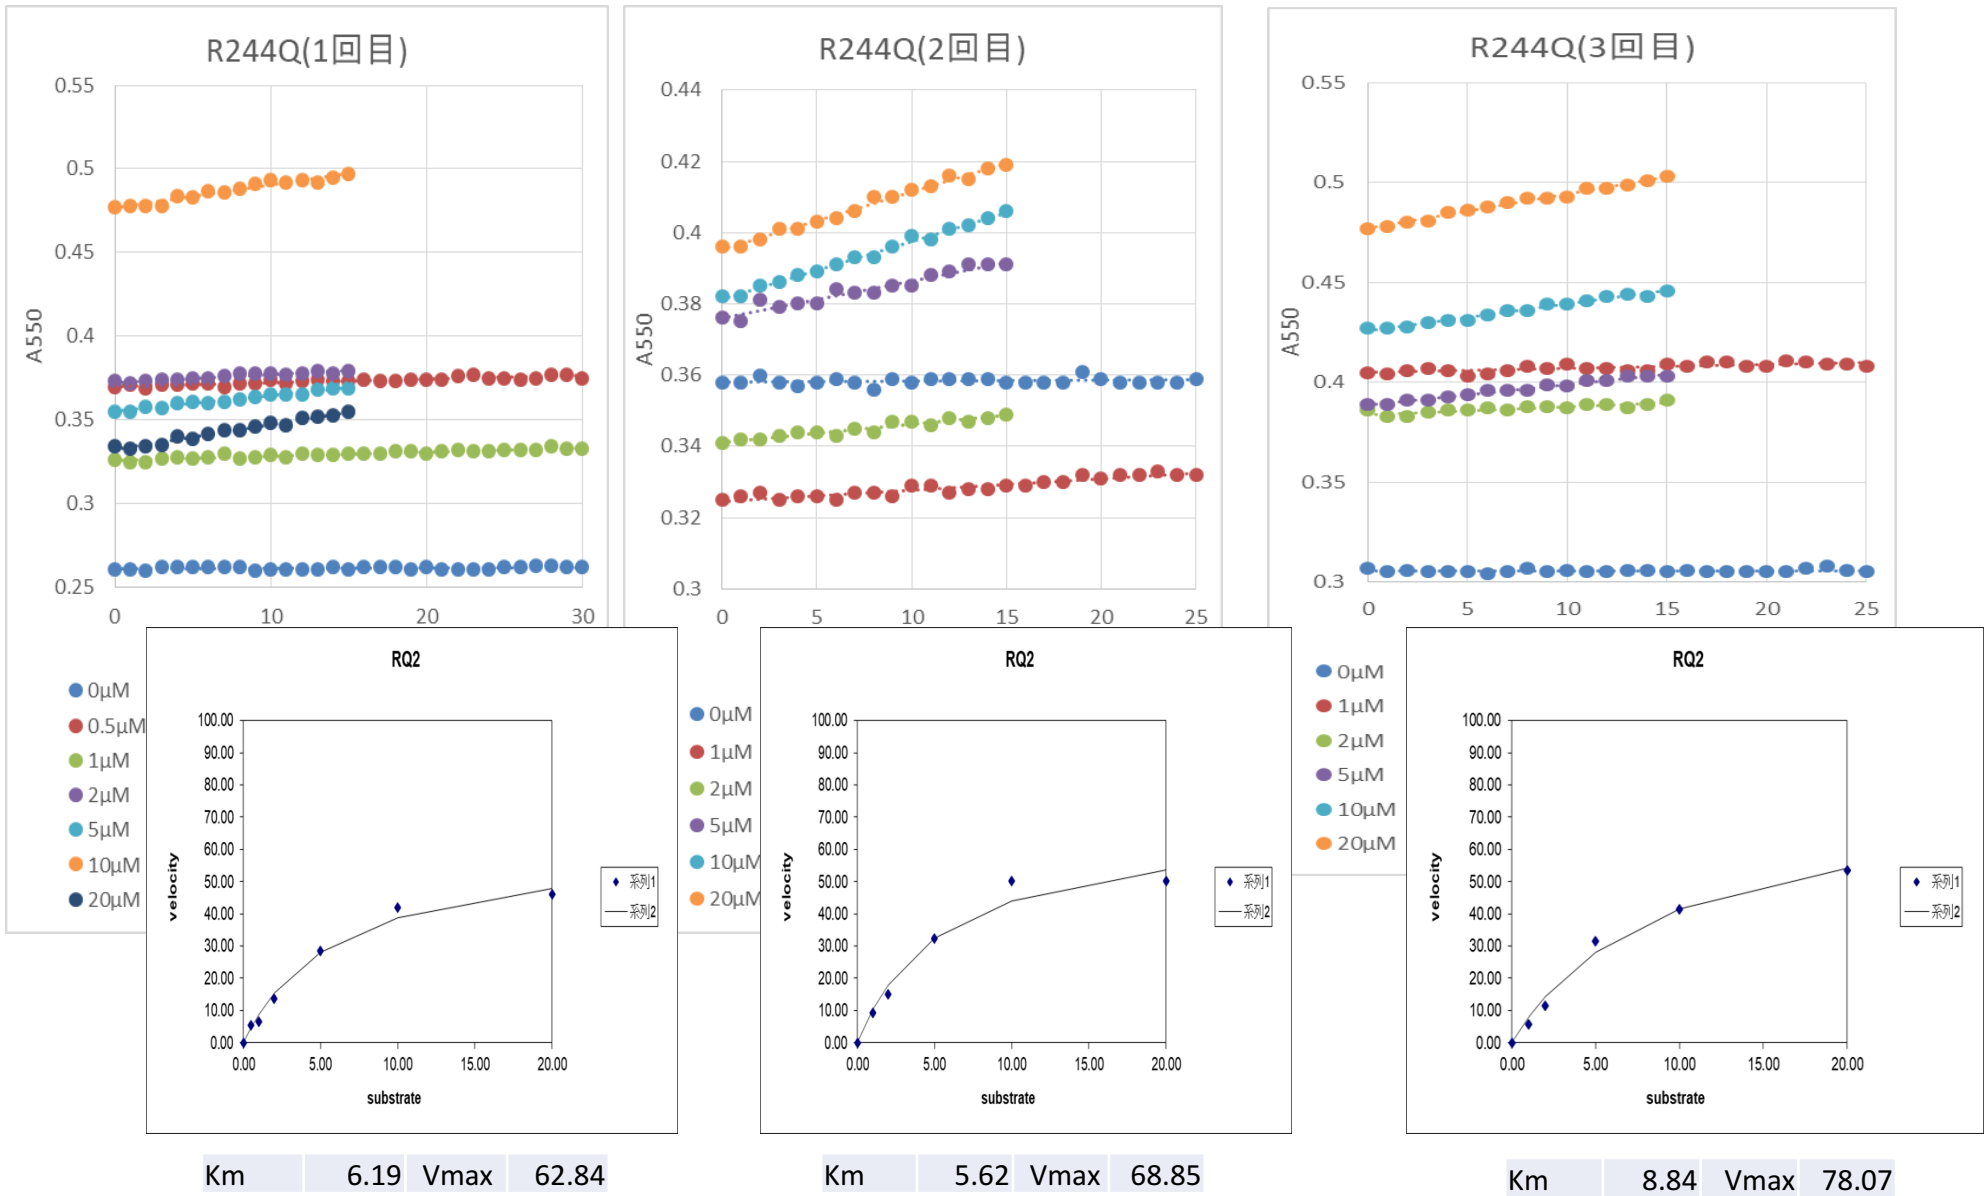

|            |            |
|------------|------------|
|            | R244Q      |
| Vmax (e/s) | 69.92±6.26 |
| Km (μM)    | 6.88±1.4   |

# Cyt c reduction assay of Y314S FNR at 1 mM NADPH

numbers below X-axis: concentration of LFd ( $\mu\text{M}$ )

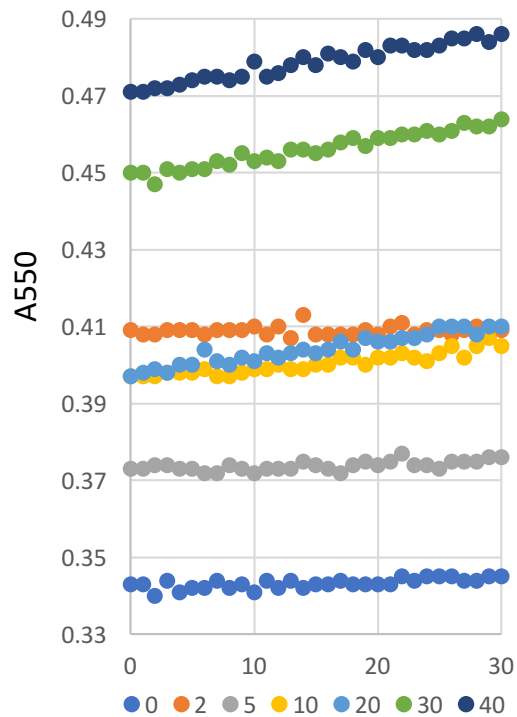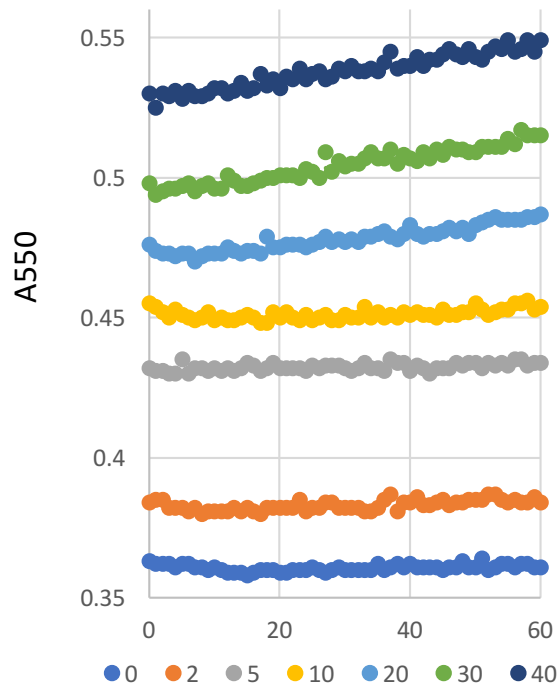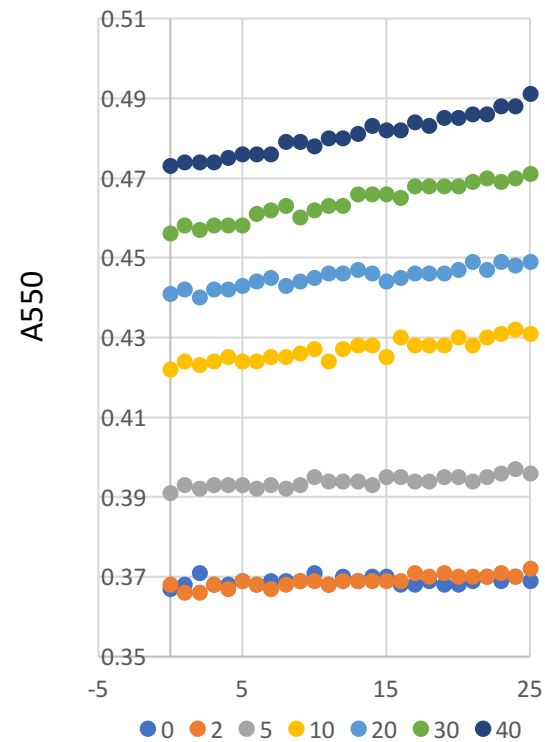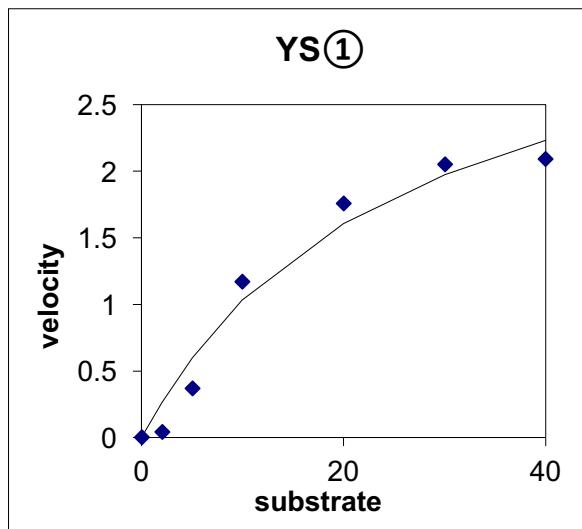

$K_m = 25.30715282$   
 $V_{max} = 3.644712207$

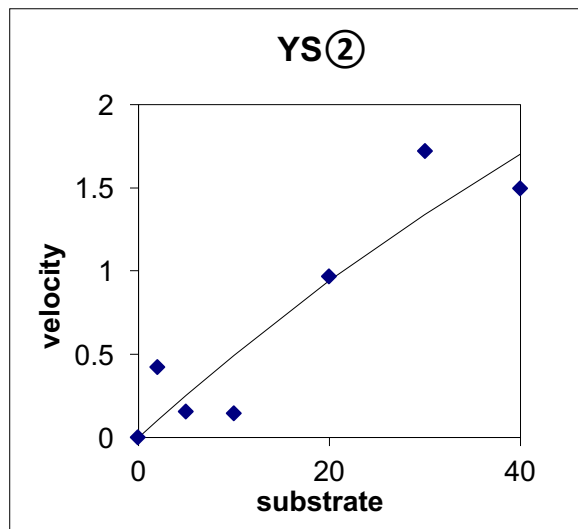

Not determined

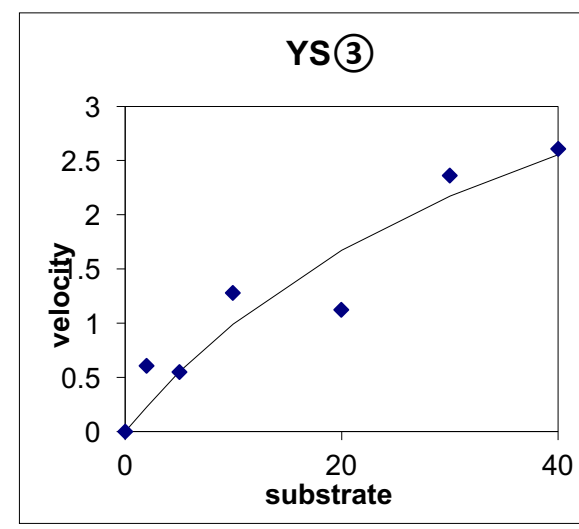

Not determined
