# Supplementary material for: NADP(H) allosterically regulates the interaction between ferredoxin and ferredoxin‐NADP+ reductase
Source: PubMed Central journal article supplement (PMC6886308; doi:10.1002/2211-5463.12752), 2019-11-15
Supplement: FEB4-9-2126-s003.pdf [file FEB4-9-2126-s003.pdf]

# Diaphorase activity of wild-type FNR

X-axis: time(s) , Y-axis: A600nm, numbers below X-axis: concentration of NADPH( $\mu\text{M}$ )

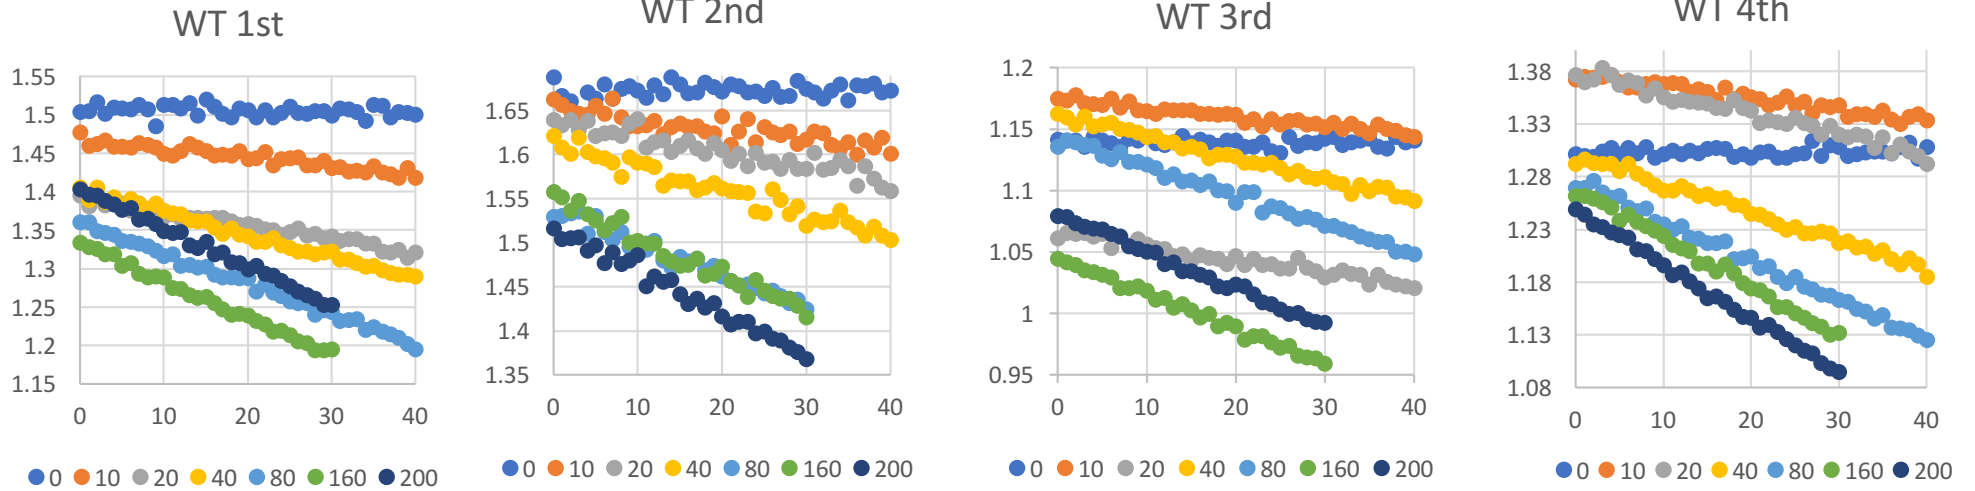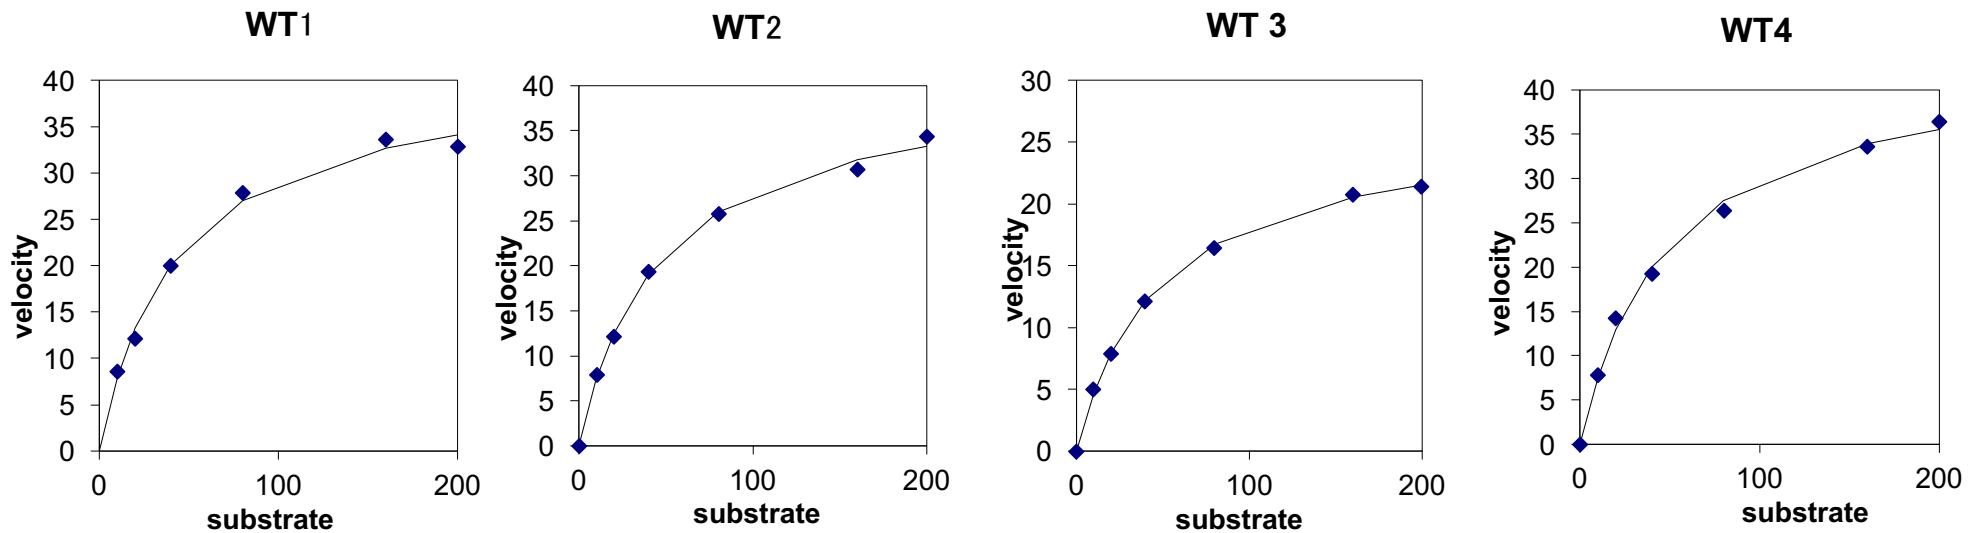

| WT                   | 1     | 2     | 3     | 4     | Average | SD          |
|----------------------|-------|-------|-------|-------|---------|-------------|
| Km ( $\mu\text{M}$ ) | 49.53 | 41.29 | 47.31 | 43.97 | 45.525  | 3.145612023 |
| Vmax ( $2e/s$ )      | 44.95 | 38.81 | 26.62 | 42.1  | 38.12   | 6.985975236 |

$k_{\text{cat}}$  ( $e^-/s$ ) Ave 76 SD 14

# Diaphorase activity of Y314S FNR

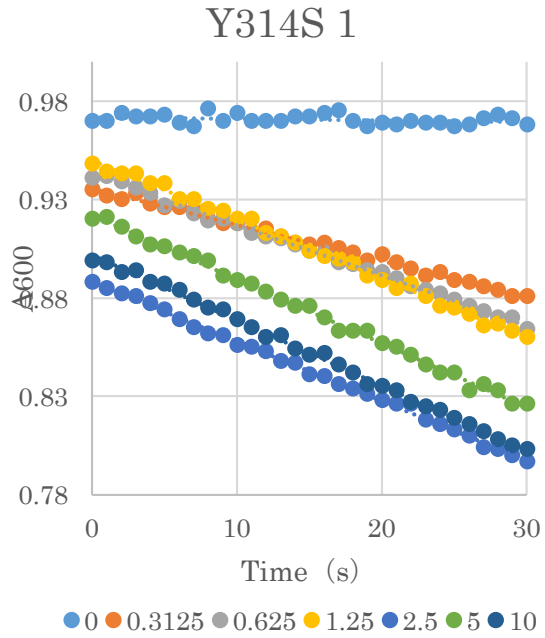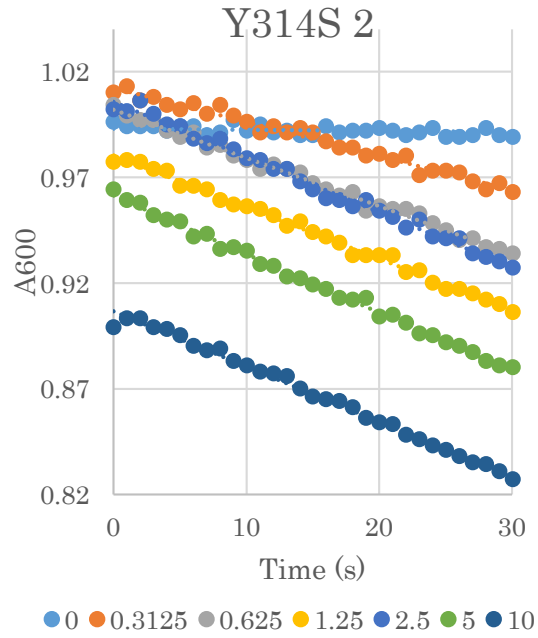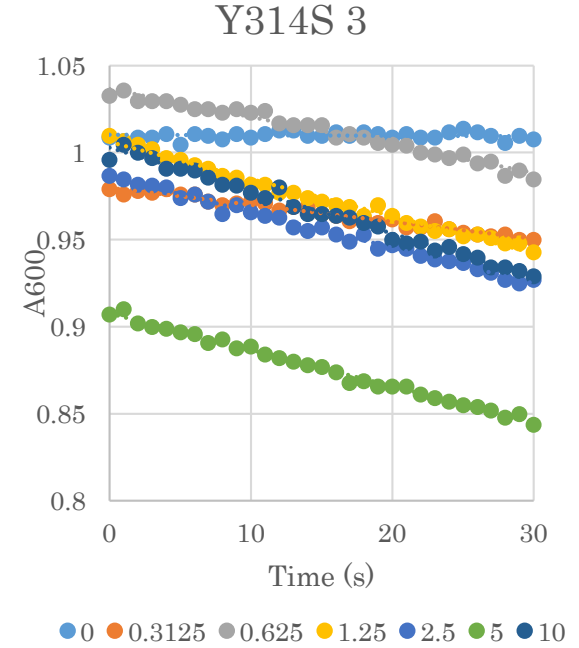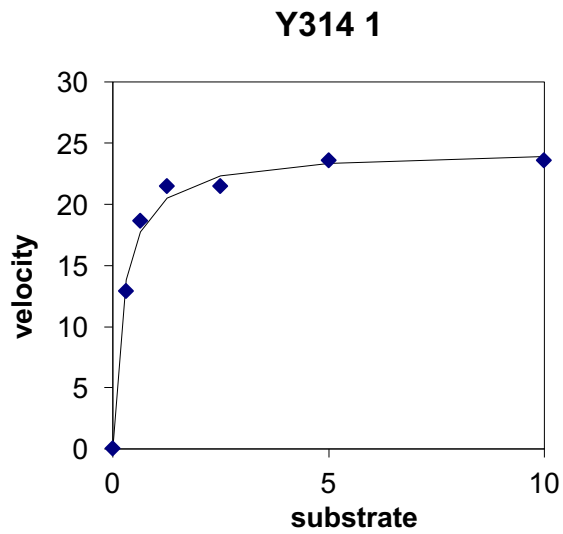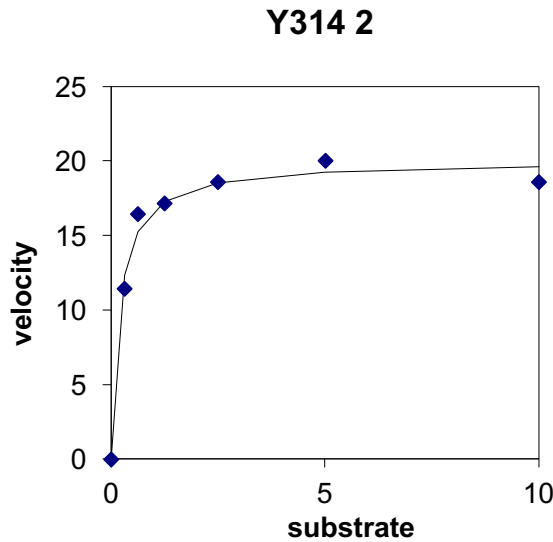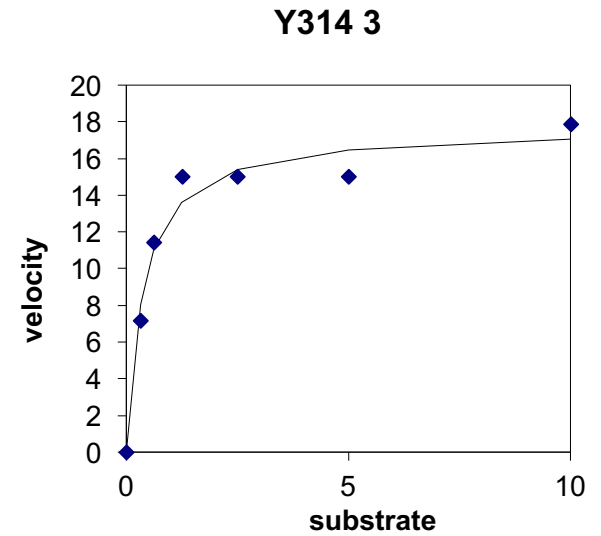

| Y314S                 | 1           | 2           | 3           | Average     | SD          |
|-----------------------|-------------|-------------|-------------|-------------|-------------|
| Km ( $\mu\text{M}$ )= | 0.195210554 | 0.240869156 | 0.373870879 | 0.26998353  | 0.075787479 |
| Vmax (2e/s)=          | 20.00299715 | 24.47986808 | 17.69554103 | 20.72613542 | 2.81649547  |

$k_{\text{cat}}$  ( $e^-/s$ ) Ave 41 SD 6

# Diaphorase activity of R235Q FNR

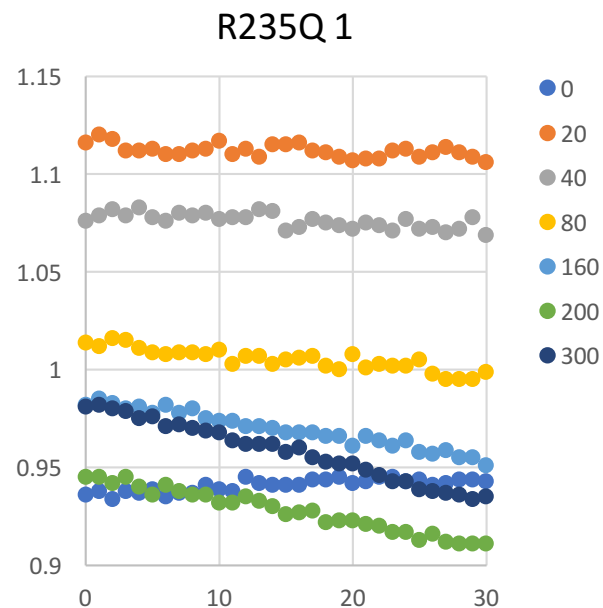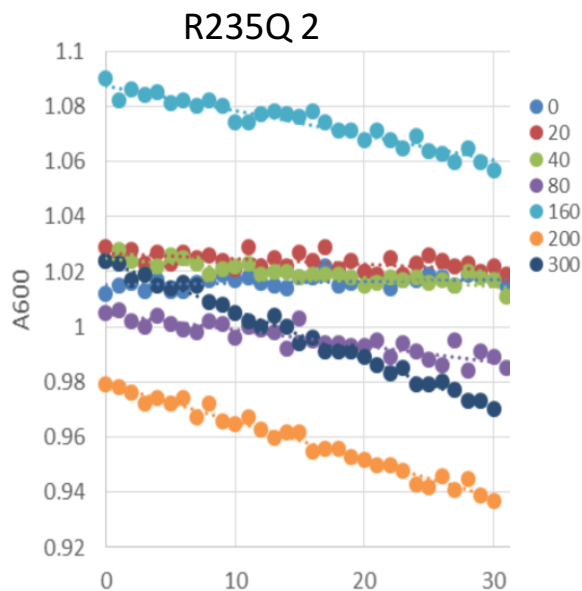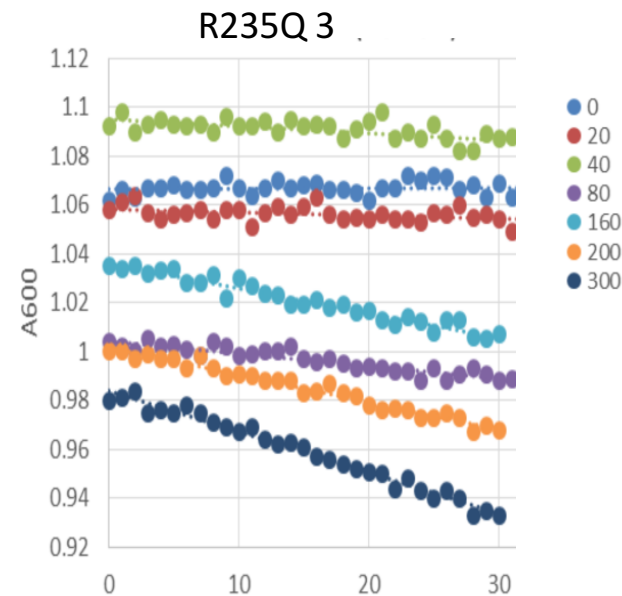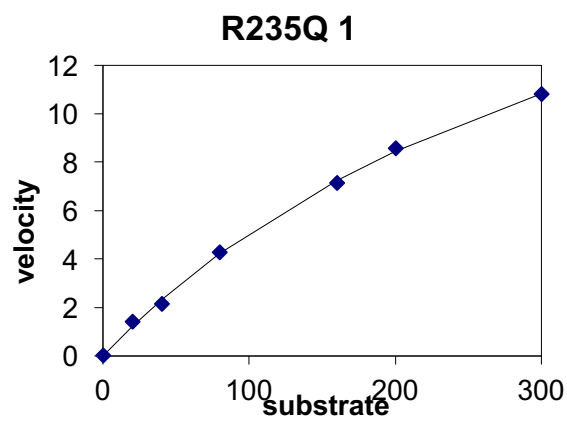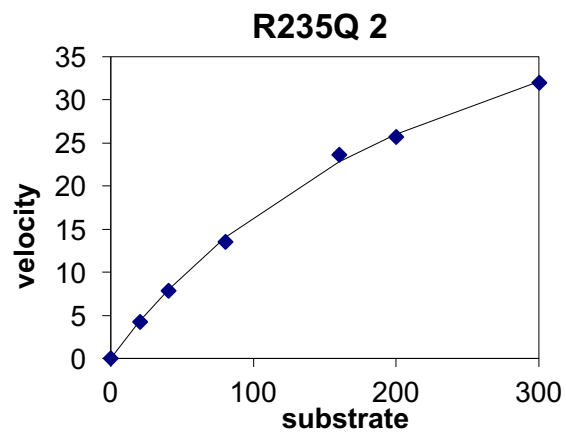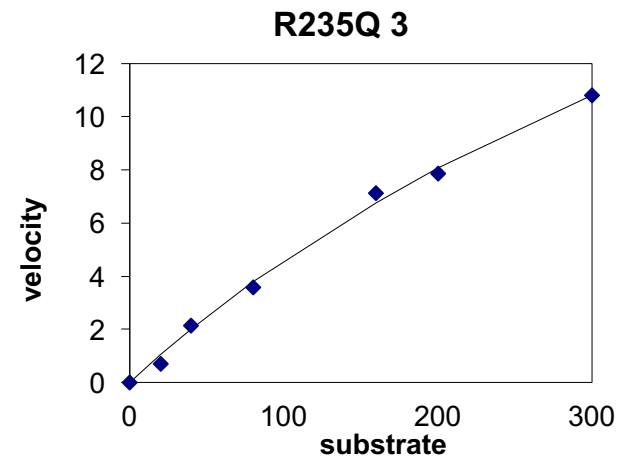

| R235Q                | 1    | 2    | 3    | Average | SD  |
|----------------------|------|------|------|---------|-----|
| Km ( $\mu\text{M}$ ) | 417  | 407  | 664  | 496     | 119 |
| Vmax (2e/s)          | 26.2 | 28.2 | 34.9 | 29.8    | 3.7 |

$k_{\text{cat}}$  (e<sup>-</sup>/s) Ave 60 SD 7

# Diaphorase activity of R244Q FNR

R244Q 1

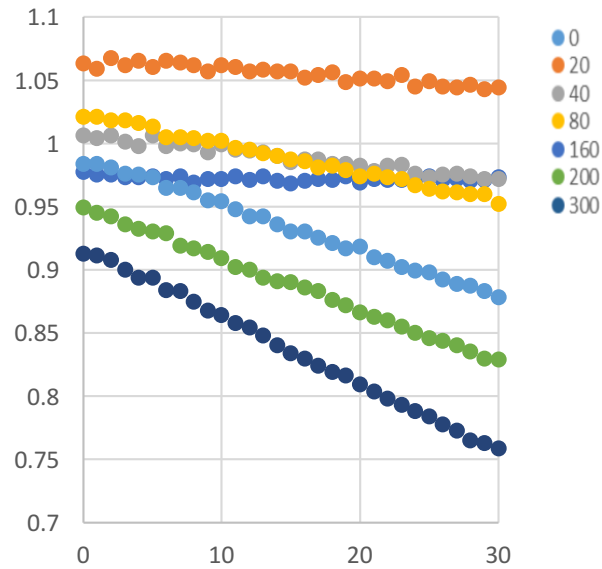

R244Q 2

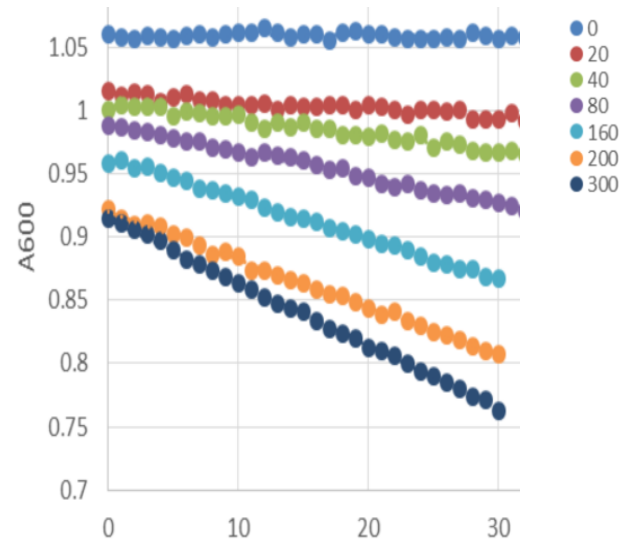

R244Q 3

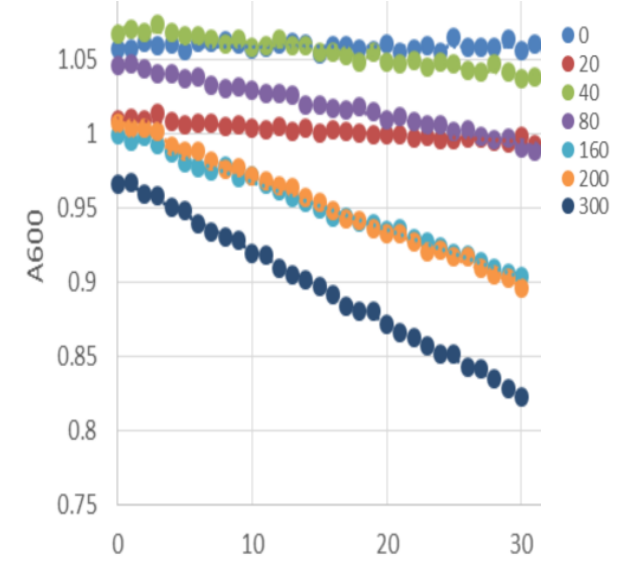

R244Q 1

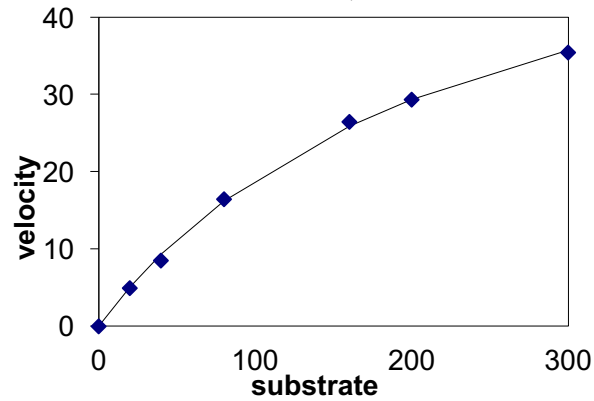

R244Q 2

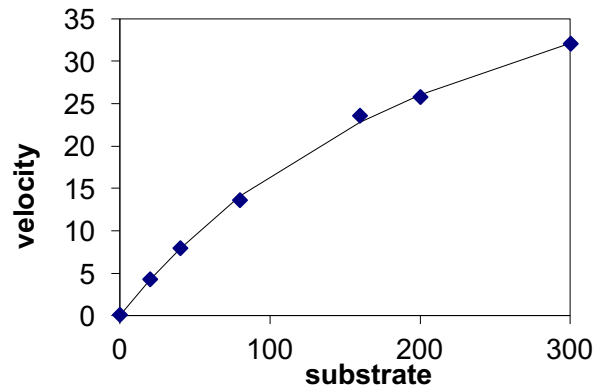

R244Q 3

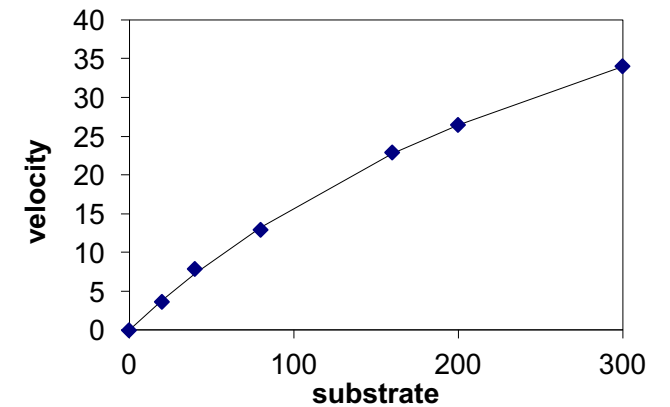

| R244Q                | 1    | 2    | 3    | Average | SD  |
|----------------------|------|------|------|---------|-----|
| Km ( $\mu\text{M}$ ) | 252  | 280  | 391  | 308     | 60  |
| Vmax (2e/s)          | 67.1 | 62.8 | 78.2 | 69.4    | 6.5 |

$k_{\text{cat}}$  (e-/s) Ave 139 SD 13
