# Supplementary material for: NADP(H) allosterically regulates the interaction between ferredoxin and ferredoxin‐NADP+ reductase
Source: PubMed Central journal article supplement (PMC6886308; doi:10.1002/2211-5463.12752), 2019-11-15
Supplement: FEB4-9-2126-s004.pdf [file FEB4-9-2126-s004.pdf]

Table SI. Synthetic oligonucleotides used for the site-directed mutagenesis.

| LFNR mutants |                 | PCR primers (5'→3')                |
|--------------|-----------------|------------------------------------|
| R235Q        | FW <sup>1</sup> | 5'-GACTACGCCGTCAGCCAGGAGCAGACG-3'  |
|              | RV <sup>2</sup> | 5'-CGTCTGCTCCTGGCTGACGGCGTAGTC-3'  |
| R244Q        | FW              | 5'-GCGGCGGGGGAGCAGATGTACATCCAG-3'  |
|              | RV              | 5'-CTGGATGTACATCTGCTCCCCCGCCGC-3'  |
| Y314S        | FW              | 5'- GGAATGTGGAGGTCTCCTAACCGCTG -3' |
|              | RV              | 5'- CAGCGGTTAGGAGACCTCCACATTCC -3' |

<sup>1</sup>forward primers

<sup>2</sup>reverse primers
